# Supplementary material
Source: PubMed Central journal article supplement (PMC6583065)
Supplement: jamacardiol-3-1081-s001.pdf [file jamacardiol-3-1081-s001.pdf]

## Supplementary Online Content

Mohammad MA, Koul S, Rylance R, et al. Association of weather with day-to-day incidence of myocardial infarction: a SWEDEHEART nationwide observational study. *JAMA Surg*. Published online October 24, 2018. doi:10.1001/jamacardio.2018.3466

### **eAppendix.**

**eTable 1.** Baseline Demographics for Study Population

**eTable 2.** Average Weather Variable for Sweden and the 6 Healthcare Regions Stratified by Each Quarter

**eTable 3.** Results of Primary and Secondary Analyses Including Seasonal and Sensitivity Analyses

**eTable 4.** Results of Subgroup Analyses

**eFigure 1.** Nationwide Daily Incidence Rate of Myocardial Infarction by Air Pressure,  $\delta$  Temperature, Humidity, Precipitation, Sunshine Duration, and Wind Velocity for STEMI and NSTEMI

**eFigure 2.** Incidence of Myocardial Infarction by Air Temperature and Region

**eFigure 3.** Nationwide Daily Incidence Rate of Myocardial Infarction by Temperature With Lag Effect

**eFigure 4.** Lag of 1, 3, 5, and 7 Days

This supplementary material has been provided by the authors to give readers additional information about their work.

**eTable 1. Baseline demographics for study population.**

|                               | <b>Total MI</b> | <b>STEMI</b>   | <b>NSTEMI</b>   |
|-------------------------------|-----------------|----------------|-----------------|
|                               | <i>n=274029</i> | <i>n=92044</i> | <i>n=181985</i> |
| Age ± sd                      | 71.7±12.2       | 69.2±12.5      | 73.0±11.8       |
| Age ≥ 75 years                | 127825 (46.6)   | 34862 (37.9)   | 92963 (51.1)    |
| Age <75 years                 | 146200 (53.4)   | 57182 (62.1)   | 89018 (48.9)    |
| BMI mean±sd                   | 26.7±5.8        | 26.6±6.7       | 26.8±5.2        |
| Sex                           |                 |                |                 |
| Men                           | 174576 (63.7)   | 61053 (66.3)   | 113523 (62.4)   |
| Women                         | 99453 (36.3)    | 30991 (33.7)   | 68462 (37.6)    |
| EGFR<60 (%)                   | 66351 (24.2)    | 16415 (17.8)   | 49936 (27.4)    |
| Smoking                       |                 |                |                 |
| Non-Smoker                    | 196867 (71.8)   | 61389 (66.7)   | 135478 (74.4)   |
| Current Smoker                | 53980 (19.7)    | 23821 (25.9)   | 30159 (16.6)    |
| <b>Past Medical History</b>   |                 |                |                 |
| Diabetes                      | 60134 (21.9)    | 15244 (16.6)   | 44890 (24.7)    |
| Hypertension                  | 119799 (43.7)   | 35184 (38.2)   | 84615 (46.5)    |
| Coronary Artery Disease       | 97403 (35.5)    | 20512 (22.3)   | 76891 (42.3)    |
| Myocardial Infarction         | 88325 (32.2)    | 18628 (20.2)   | 69697 (38.3)    |
| PCI                           | 32131 (11.7)    | 7409 (8.0)     | 24722 (13.6)    |
| CABG                          | 23273 (8.5)     | 3602 (3.9)     | 19671 (10.8)    |
| Chronic HF                    | 31858 (11.6)    | 5741 (6.2)     | 26117 (14.4)    |
| Stroke                        | 16721 (6.1)     | 3862 (4.2)     | 12859 (7.1)     |
| <b>Previous Medications</b>   |                 |                |                 |
| Beta-blockers                 | 117207 (42.8)   | 28885 (31.4)   | 88322 (48.5)    |
| Calcium Antagonists           | 49613 (18.1)    | 13185 (14.3)   | 36428 (20.0)    |
| Aspirin                       | 119672 (43.7)   | 28200 (30.6)   | 91472 (50.3)    |
| ACE-Inhibitor                 | 86057 (31.4)    | 20305 (22.1)   | 65752 (36.1)    |
| Statins                       | 73271 (26.7)    | 16479 (17.9)   | 56792 (31.2)    |
| Diuretics                     | 84416 (30.8)    | 18486 (20.1)   | 65930 (36.2)    |
| <b>In-hospital Procedures</b> |                 |                |                 |
| Angiography                   | 140093 (51.1)   | 55680 (60.5)   | 84413 (46.4)    |
| PCI                           | 107734 (39.3)   | 51923 (56.4)   | 55811 (30.7)    |
| <b>Regions</b>                |                 |                |                 |
| Southeast                     | 34358 (12.5)    | 12009 (13.0)   | 22349 (12.3)    |
| South                         | 49333 (18.0)    | 16865 (18.3)   | 32468 (17.8)    |
| West                          | 52413 (19.1)    | 17758 (19.3)   | 34655 (19.0)    |
| Uppsala/Orebro                | 71978 (26.3)    | 24019 (26.1)   | 47959 (26.4)    |

|           |              |              |              |
|-----------|--------------|--------------|--------------|
| North     | 23906 (8.7)  | 8005 (8.7)   | 15901 (8.7)  |
| Stockholm | 42041 (15.3) | 13388 (14.5) | 28653 (15.7) |

MI = Myocardial Infarction; BMI = Body Mass Index; CABG = Coronary Artery Bypass Graft; EGFR = Estimated Glomerular Filtration Rate; NSTEMI = Non-ST-Elevation Myocardial Infarction; PCI = Percutaneous Coronary Intervention; STEMI = ST-Elevation Myocardial Infarction.

**eTable 2.**

Average weather variable for Sweden and the 6 healthcare regions stratified by each quarter.

| Supplementary Table 1. | Air Temp. (°C) | Min air temp. (°C) | Max air Temp. (°C) | Eff. air Temp. (°C) | Delta Temp. (°C) | Wind (m/s) | Precipitation (mm) | Humidity (%) | Air Pressure (kPa) | Sunshine duration (h) |
|------------------------|----------------|--------------------|--------------------|---------------------|------------------|------------|--------------------|--------------|--------------------|-----------------------|
| Sweden                 |                |                    |                    |                     |                  |            |                    |              |                    |                       |
| Jan-March              | -1,7           | -5,1               | 1,6                | -7,3                | 6,8              | 6,5        | 1,4                | 84,3         | 1011,9             | 3,0                   |
| Apr-June               | 10,2           | 5,0                | 15,3               | 3,4                 | 10,3             | 6,0        | 1,8                | 74,0         | 1013,4             | 8,1                   |
| Jul-Sep                | 15,0           | 10,5               | 19,7               | 5,9                 | 9,3              | 5,6        | 2,4                | 80,7         | 1012,3             | 6,8                   |
| Oct-Dec                | 2,6            | -0,2               | 5,3                | -2,3                | 5,6              | 6,5        | 2,2                | 88,8         | 1010,9             | 2,0                   |
| South                  |                |                    |                    |                     |                  |            |                    |              |                    |                       |
| Jan-March              | 0,6            | -2,3               | 3,6                | -5,0                | 5,9              | 7,7        | 1,6                | 85,9         | 1013,6             | 2,9                   |
| Apr-June               | 11,2           | 6,2                | 16,4               | 3,7                 | 10,2             | 6,7        | 1,8                | 76,3         | 1014,3             | 8,0                   |
| Jul-Sep                | 15,8           | 11,4               | 20,6               | 6,2                 | 9,2              | 6,4        | 2,4                | 81,1         | 1013,5             | 6,8                   |
| Oct-Dec                | 4,7            | 2,0                | 7,3                | -0,6                | 5,3              | 7,5        | 2,2                | 88,6         | 1012,6             | 2,0                   |
| Southeast              |                |                    |                    |                     |                  |            |                    |              |                    |                       |
| Jan-March              | -1,0           | -4,2               | 2,1                | -6,7                | 6,4              | 6,7        | 1,1                | 85,8         | 1012,7             | 2,9                   |
| Apr-June               | 10,3           | 4,9                | 15,5               | 3,2                 | 10,6             | 6,0        | 1,7                | 74,3         | 1013,7             | 8,1                   |
| Jul-Sep                | 15,0           | 10,3               | 19,7               | 5,8                 | 9,4              | 5,7        | 2,3                | 81,7         | 1012,7             | 6,7                   |
| Oct-Dec                | 3,1            | 0,4                | 5,8                | -2,0                | 5,4              | 6,6        | 1,9                | 90,4         | 1011,8             | 2,0                   |
| West                   |                |                    |                    |                     |                  |            |                    |              |                    |                       |
| Jan-March              | -0,2           | -3,2               | 2,8                | -5,6                | 6,0              | 6,4        | 1,9                | 84,8         | 1012,4             | 2,9                   |
| Apr-June               | 10,9           | 6,0                | 15,8               | 3,7                 | 9,8              | 5,6        | 2,2                | 74,9         | 1013,5             | 7,7                   |
| Jul-Sep                | 15,4           | 11,2               | 19,9               | 6,1                 | 8,7              | 5,2        | 2,9                | 81,3         | 1012,5             | 6,4                   |
| Oct-Dec                | 3,9            | 1,2                | 6,5                | -1,2                | 5,3              | 6,3        | 3,0                | 89,1         | 1011,3             | 2,0                   |
| Stockholm              |                |                    |                    |                     |                  |            |                    |              |                    |                       |
| Jan-March              | -1,0           | -4,1               | 1,9                | -6,6                | 6,0              | 6,4        | 1,1                | 82,8         | 1011,7             | 2,9                   |
| Apr-June               | 10,4           | 5,5                | 15,4               | 2,8                 | 10,0             | 5,9        | 1,3                | 74,1         | 1013,4             | 9,1                   |
| Jul-Sep                | 15,7           | 11,5               | 20,3               | 5,8                 | 8,8              | 5,5        | 2,0                | 79,6         | 1012,3             | 7,8                   |

|                |      |       |      |       |      |     |     |      |            |     |
|----------------|------|-------|------|-------|------|-----|-----|------|------------|-----|
| Oct-Dec        | 3,7  | 1,1   | 6,1  | -1,5  | 4,9  | 6,6 | 1,8 | 87,3 | 1011,<br>0 | 2,1 |
| Uppsala/Örebro |      |       |      |       |      |     |     |      |            |     |
| Jan-March      | -2,4 | -6,0  | 1,1  | -7,9  | 7,1  | 5,7 | 1,2 | 83,2 | 1011,<br>5 | 3,2 |
| Apr-June       | 10,1 | 4,8   | 15,5 | 3,3   | 10,7 | 5,7 | 1,7 | 71,6 | 1013,<br>2 | 8,1 |
| Jul-Sep        | 14,9 | 10,1  | 19,8 | 5,7   | 9,7  | 5,1 | 2,3 | 79,9 | 1011,<br>9 | 7,0 |
| Oct-Dec        | 1,9  | -1,1  | 4,6  | -2,9  | 5,7  | 5,7 | 1,9 | 89,0 | 1010,<br>6 | 2,2 |
| Northern       |      |       |      |       |      |     |     |      |            |     |
| Jan-March      | -6,3 | -11,1 | -2,2 | -13,1 | 8,9  | 6,6 | 1,1 | 83,1 | 1009,<br>5 | 3,0 |
| Apr-June       | 7,2  | 2,1   | 12,1 | 0,5   | 9,9  | 6,2 | 1,4 | 74,6 | 1012,<br>3 | 8,0 |
| Jul-Sep        | 13,2 | 8,9   | 17,7 | 4,9   | 8,8  | 6,2 | 2,3 | 80,8 | 1010,<br>9 | 6,7 |
| Oct-Dec        | -0,6 | -4,0  | 2,4  | -6,6  | 6,4  | 7,0 | 1,7 | 86,8 | 1008,<br>8 | 2,0 |

eTable 3. Results.

| Meteorological variable         | Unadjusted          |         |                     |         |                     |         | Adjusted            |         |                     |         |                     |         |
|---------------------------------|---------------------|---------|---------------------|---------|---------------------|---------|---------------------|---------|---------------------|---------|---------------------|---------|
|                                 | Total MI            |         | NSTEMI              |         | STEMI               |         | Total MI            |         | NSTEMI              |         | STEMI               |         |
|                                 | IRR (95%CI)         | P-value |
| <b>Min. Air Temp. (°C)</b>      | 0.972 (0.967-0.977) | <0.0001 | 0.976 (0.97-0.982)  | <0.0001 | 0.964 (0.958-0.971) | <0.0001 | 0.974 (0.969-0.98)  | <0.0001 | 0.981 (0.973-0.988) | <0.0001 | 0.962 (0.954-0.97)  | <0.0001 |
| <b>Precipitation (mm)</b>       | 0.992 (0.987-0.997) | 0.0096  | 0.993 (0.987-0.999) | 0.1661  | 0.99 (0.984-0.997)  | 0.0171  | 0.989 (0.983-0.995) | 0.0015  | 0.99 (0.983-0.998)  | 0.0395  | 0.987 (0.979-0.996) | 0.0203  |
| <b>Air Humidity (%)</b>         | 1 (0.995-1.005)     | 0.9786  | 0.999 (0.992-1.005) | 0.6643  | 1.003 (0.996-1.01)  | 0.3888  | 0.999 (0.988-1.01)  | 0.8419  | 0.999 (0.985-1.013) | 0.8703  | 0.999 (0.984-1.015) | 0.9071  |
| <b>Air Pressure (kPa)</b>       | 0.993 (0.988-0.998) | 0.0137  | 0.996 (0.99-1.002)  | 0.6012  | 0.987 (0.981-0.994) | 0.0009  | 0.987 (0.981-0.993) | 0.0001  | 0.99 (0.983-0.998)  | 0.0395  | 0.981 (0.972-0.989) | <0.0001 |
| <b>Wind (m/s)</b>               | 1.012 (1.007-1.017) | <0.0001 | 1.012 (1.006-1.018) | 0.0012  | 1.013 (1.006-1.02)  | 0.0009  | 1.012 (1.005-1.018) | 0.0015  | 1.012 (1.004-1.02)  | 0.0128  | 1.01 (1.001-1.019)  | 0.1189  |
| <b>Sunshine Duration (h)</b>    | 0.987 (0.983-0.992) | <0.0001 | 0.988 (0.982-0.994) | 0.0007  | 0.986 (0.979-0.993) | 0.0007  | 0.986 (0.973-0.999) | 0.0874  | 0.978 (0.962-0.994) | 0.0381  | 1.002 (0.983-1.021) | 0.9071  |
| <b>Delta Air Temp. (°C)</b>     | 0.999 (0.994-1.004) | 0.9786  | 1.003 (0.997-1.009) | 0.6643  | 0.992 (0.986-0.999) | 0.0461  | 1.016 (1.007-1.025) | 0.0029  | 1.023 (1.011-1.035) | 0.001   | 1.002 (0.989-1.015) | 0.9071  |
| <b>Snow (mm)*</b>               | 1.008 (1.003-1.014) | 0.01    | 1.006 (0.999-1.012) | 0.45    | 1.013 (1.006-1.02)  | 0.001   | 1.008 (1.001-1.015) | 0.48    | 1.006 (0.997-1.015) | 0.338   | 1.012 (1.002-1.022) | 0.115   |
| <b>Average Air Temp. (°C)</b>   | 0.974 (0.969-0.979) | <0.0001 | 0.979 (0.972-0.985) | <0.0001 | 0.965 (0.959-0.972) | <0.0001 |                     |         |                     |         |                     |         |
| <b>Max. Air Temp. (°C)</b>      | 0.976 (0.971-0.98)  | <0.0001 | 0.98 (0.974-0.987)  | <0.0001 | 0.966 (0.96-0.973)  | <0.0001 |                     |         |                     |         |                     |         |
| <b>Effective Air Temp. (°C)</b> | 0.992 (0.987-0.997) | 0.0137  | 0.995 (0.988-1.002) | 0.6012  | 0.986 (0.979-0.993) | 0.0009  |                     |         |                     |         |                     |         |
| <b>Regions</b>                  |                     |         |                     |         |                     |         |                     |         |                     |         |                     |         |
| <b>South</b>                    |                     |         |                     |         |                     |         |                     |         |                     |         |                     |         |
| <b>Min. Air Temp. (°C)</b>      | 0.97 (0.961-0.98)   | <0.0001 | 0.975 (0.963-0.986) | 0.0003  | 0.962 (0.948-0.977) | <0.0001 | 0.971 (0.961-0.981) | <0.0001 | 0.975 (0.963-0.988) | 0.0011  | 0.963 (0.947-0.979) | 0.0001  |
| <b>Precipitation (mm)</b>       | 0.987 (0.977-0.997) | 0.0642  | 0.989 (0.977-1.001) | 0.4251  | 0.983 (0.968-0.999) | 0.2439  | 0.991 (0.979-1.002) | 0.6253  | 0.994 (0.98-1.008)  | 0.9562  | 0.985 (0.967-1.003) | 0.5231  |
| <b>Air Humidity (%)</b>         | 0.994 (0.985-1.004) | 0.7279  | 0.994 (0.982-1.006) | 0.7931  | 0.995 (0.979-1.01)  | 0.8083  | 1.004 (0.987-1.021) | 0.8059  | 0.999 (0.978-1.021) | 0.9562  | 1.013 (0.985-1.041) | 0.9907  |
| <b>Air Pressure (kPa)</b>       | 1.006 (0.996-1.015) | 0.7279  | 1.007 (0.995-1.019) | 0.7931  | 1.003 (0.987-1.018) | 0.8083  | 0.994 (0.983-1.006) | 0.8059  | 0.994 (0.98-1.008)  | 0.9562  | 0.994 (0.976-1.013) | 0.9907  |
| <b>Wind (m/s)</b>               | 1.002 (0.992-1.012) | 0.7279  | 0.996 (0.984-1.008) | 0.7931  | 1.013 (0.998-1.029) | 0.5129  | 1.009 (0.996-1.021) | 0.8059  | 0.999 (0.984-1.014) | 0.9562  | 1.028 (1.008-1.049) | 0.0407  |
| <b>Sunshine Duration (h)</b>    | 0.998 (0.989-1.008) | 0.7279  | 0.998 (0.986-1.01)  | 0.7931  | 0.998 (0.983-1.014) | 0.8083  | 0.997 (0.977-1.018) | 0.8059  | 0.995 (0.97-1.021)  | 0.9562  | 1.002 (0.969-1.036) | 0.9907  |
| <b>Delta Air Temp. (°C)</b>     | 1.011 (1.001-1.021) | 0.1626  | 1.012 (1-1.024)     | 0.388   | 1.01 (0.994-1.025)  | 0.8083  | 1.016 (0.998-1.033) | 0.5694  | 1.011 (0.989-1.032) | 0.9562  | 1.025 (0.997-1.054) | 0.469   |
| <b>Snow (mm)*</b>               | 1.007 (0.993-1.021) | 0.7279  | 1.009 (0.992-1.026) | 0.7931  | 1.003 (0.981-1.024) | 0.8083  | 1.006 (0.99-1.023)  | 0.8059  | 1.01 (0.99-1.03)    | 0.9562  | 1 (0.974-1.027)     | 0.9907  |
| <b>Average Air Temp. (°C)</b>   | 0.977 (0.967-0.986) | <0.0001 | 0.981 (0.969-0.993) | 0.0139  | 0.969 (0.954-0.983) | 0.0004  |                     |         |                     |         |                     |         |

|                                 |                     |        |                     |        |                     |        |
|---------------------------------|---------------------|--------|---------------------|--------|---------------------|--------|
| <b>Max. Air Temp. (°C)</b>      | 0.98 (0.971-0.99)   | 0.0006 | 0.984 (0.973-0.996) | 0.0882 | 0.973 (0.958-0.988) | 0.0035 |
| <b>Effective Air Temp. (°C)</b> | 1.003 (0.991-1.015) | 0.8958 | 1.003 (0.988-1.018) | 0.7657 | 1.002 (0.984-1.021) | 0.8087 |

## Southeast

|                                 |                     |         |                     |        |                     |        |                     |         |                     |        |                     |        |
|---------------------------------|---------------------|---------|---------------------|--------|---------------------|--------|---------------------|---------|---------------------|--------|---------------------|--------|
| <b>Min. Air Temp. (°C)</b>      | 0.975 (0.964-0.985) | <0.0001 | 0.974 (0.961-0.987) | 0.0012 | 0.976 (0.959-0.994) | 0.066  | 0.972 (0.96-0.984)  | <0.0001 | 0.973 (0.958-0.988) | 0.0026 | 0.971 (0.952-0.991) | 0.0403 |
| <b>Precipitation (mm)</b>       | 0.991 (0.98-1.002)  | 0.6722  | 0.989 (0.976-1.003) | 0.8995 | 0.993 (0.975-1.011) | 0.8557 | 0.992 (0.979-1.005) | 0.845   | 0.993 (0.977-1.009) | 0.9983 | 0.99 (0.969-1.011)  | 0.8457 |
| <b>Air Humidity (%)</b>         | 1 (0.989-1.01)      | 0.9564  | 0.998 (0.985-1.012) | 0.8995 | 1.002 (0.984-1.02)  | 0.8557 | 0.998 (0.975-1.02)  | 0.845   | 0.998 (0.971-1.027) | 0.9983 | 0.996 (0.959-1.035) | 0.8457 |
| <b>Air Pressure (kPa)</b>       | 0.993 (0.982-1.004) | 0.9564  | 0.999 (0.986-1.013) | 0.8995 | 0.982 (0.964-1)     | 0.3094 | 0.986 (0.973-0.999) | 0.2533  | 0.99 (0.974-1.007)  | 0.9983 | 0.978 (0.956-0.999) | 0.3119 |
| <b>Wind (m/s)</b>               | 1.006 (0.995-1.017) | 0.9564  | 1.001 (0.988-1.015) | 0.8995 | 1.016 (0.997-1.034) | 0.5582 | 1.003 (0.989-1.016) | 0.845   | 1.001 (0.984-1.017) | 0.9983 | 1.006 (0.984-1.029) | 0.8457 |
| <b>Sunshine Duration (h)</b>    | 0.997 (0.986-1.008) | 0.9564  | 0.997 (0.983-1.011) | 0.8995 | 0.997 (0.978-1.016) | 0.8557 | 1.01 (0.986-1.035)  | 0.845   | 1 (0.97-1.031)      | 0.9983 | 1.03 (0.988-1.073)  | 0.805  |
| <b>Delta Air Temp. (°C)</b>     | 0.997 (0.986-1.008) | 0.9564  | 1.002 (0.989-1.016) | 0.8995 | 0.988 (0.97-1.006)  | 0.7894 | 0.992 (0.972-1.012) | 0.845   | 1.004 (0.979-1.029) | 0.9983 | 0.971 (0.939-1.004) | 0.5209 |
| <b>Snow (mm)*</b>               | 1 (0.985-1.016)     | 0.9564  | 0.992 (0.973-1.011) | 0.8995 | 1.016 (0.992-1.041) | 0.7894 | 1.002 (0.982-1.023) | 0.845   | 0.997 (0.972-1.022) | 0.9983 | 1.011 (0.978-1.046) | 0.8457 |
| <b>Average Air Temp. (°C)</b>   | 0.976 (0.966-0.987) | 0.0001  | 0.977 (0.964-0.99)  | 0.0057 | 0.975 (0.958-0.993) | 0.056  |                     |         |                     |        |                     |        |
| <b>Max. Air Temp. (°C)</b>      | 0.977 (0.967-0.988) | 0.0003  | 0.979 (0.966-0.992) | 0.0173 | 0.974 (0.957-0.992) | 0.0479 |                     |         |                     |        |                     |        |
| <b>Effective Air Temp. (°C)</b> | 1.007 (0.994-1.02)  | 0.8958  | 1.015 (0.998-1.031) | 0.5447 | 0.992 (0.971-1.014) | 0.8087 |                     |         |                     |        |                     |        |

## West

|                                 |                     |         |                     |        |                     |        |                     |         |                     |        |                     |        |
|---------------------------------|---------------------|---------|---------------------|--------|---------------------|--------|---------------------|---------|---------------------|--------|---------------------|--------|
| <b>Min. Air Temp. (°C)</b>      | 0.977 (0.968-0.986) | <0.0001 | 0.981 (0.969-0.992) | 0.0124 | 0.969 (0.955-0.984) | 0.0004 | 0.977 (0.967-0.987) | <0.0001 | 0.983 (0.97-0.995)  | 0.0532 | 0.965 (0.95-0.981)  | 0.0002 |
| <b>Precipitation (mm)</b>       | 0.991 (0.982-1.001) | 0.4034  | 0.992 (0.98-1.004)  | 0.8698 | 0.991 (0.976-1.006) | 0.933  | 0.992 (0.981-1.003) | 0.646   | 0.992 (0.978-1.006) | 0.832  | 0.991 (0.973-1.01)  | 0.462  |
| <b>Air Humidity (%)</b>         | 0.989 (0.98-0.999)  | 0.1958  | 0.987 (0.975-0.999) | 0.223  | 0.994 (0.979-1.009) | 0.933  | 0.987 (0.969-1.004) | 0.646   | 0.986 (0.965-1.008) | 0.8272 | 0.988 (0.961-1.017) | 0.462  |
| <b>Air Pressure (kPa)</b>       | 0.996 (0.987-1.005) | 0.5591  | 1 (0.988-1.012)     | 0.991  | 0.988 (0.974-1.003) | 0.7115 | 0.984 (0.973-0.996) | 0.0462  | 0.988 (0.974-1.002) | 0.5056 | 0.977 (0.959-0.995) | 0.0721 |
| <b>Wind (m/s)</b>               | 1.003 (0.993-1.012) | 0.5591  | 1.002 (0.99-1.014)  | 0.991  | 1.004 (0.99-1.02)   | 0.933  | 0.999 (0.988-1.011) | 0.911   | 1.003 (0.988-1.017) | 0.832  | 0.993 (0.974-1.012) | 0.462  |
| <b>Sunshine Duration (h)</b>    | 0.997 (0.987-1.006) | 0.5591  | 0.995 (0.983-1.007) | 0.991  | 1.001 (0.985-1.016) | 0.933  | 0.99 (0.972-1.01)   | 0.911   | 0.974 (0.951-0.998) | 0.2204 | 1.024 (0.993-1.056) | 0.462  |
| <b>Delta Air Temp. (°C)</b>     | 1.007 (0.997-1.016) | 0.5591  | 1.015 (1.003-1.027) | 0.1393 | 0.992 (0.977-1.007) | 0.933  | 1.004 (0.988-1.02)  | 0.911   | 1.021 (1.001-1.041) | 0.2361 | 0.971 (0.947-0.996) | 0.1112 |
| <b>Snow (mm)*</b>               | 1.012 (0.999-1.025) | 0.4034  | 1 (0.983-1.017)     | 0.991  | 1.034 (1.014-1.054) | 0.0055 | 1.014 (0.999-1.03)  | 0.4538  | 1.002 (0.983-1.022) | 0.832  | 1.037 (1.012-1.062) | 0.0237 |
| <b>Average Air Temp. (°C)</b>   | 0.979 (0.97-0.989)  | 0.0002  | 0.984 (0.973-0.996) | 0.0823 | 0.97 (0.956-0.985)  | 0.0005 |                     |         |                     |        |                     |        |
| <b>Max. Air Temp. (°C)</b>      | 0.983 (0.974-0.993) | 0.0037  | 0.99 (0.978-1.002)  | 0.5513 | 0.97 (0.956-0.985)  | 0.0006 |                     |         |                     |        |                     |        |
| <b>Effective Air Temp. (°C)</b> | 0.999 (0.988-1.011) | 0.8958  | 1.003 (0.988-1.018) | 0.7657 | 0.992 (0.974-1.011) | 0.8087 |                     |         |                     |        |                     |        |

## Stockholm

|                                 |                     |         |                     |         |                     |         |                     |         |                     |         |                     |         |
|---------------------------------|---------------------|---------|---------------------|---------|---------------------|---------|---------------------|---------|---------------------|---------|---------------------|---------|
| <b>Min. Air Temp. (°C)</b>      | 0.965 (0.955-0.975) | <0.0001 | 0.97 (0.958-0.982)  | <0.0001 | 0.955 (0.939-0.971) | <0.0001 | 0.96 (0.949-0.972)  | <0.0001 | 0.964 (0.95-0.979)  | <0.0001 | 0.952 (0.933-0.972) | <0.0001 |
| <b>Precipitation (mm)</b>       | 0.997 (0.987-1.008) | 0.8687  | 1 (0.987-1.013)     | 0.9976  | 0.992 (0.975-1.009) | 0.833   | 0.989 (0.978-1.001) | 0.2519  | 0.991 (0.977-1.006) | 0.6929  | 0.986 (0.966-1.006) | 0.9775  |
| <b>Air Humidity (%)</b>         | 1.014 (1.003-1.024) | 0.0325  | 1.017 (1.004-1.029) | 0.0313  | 1.007 (0.99-1.025)  | 0.833   | 1.027 (1.009-1.046) | 0.0208  | 1.04 (1.018-1.063)  | 0.0026  | 1 (0.97-1.031)      | 0.988   |
| <b>Air Pressure (kPa)</b>       | 0.984 (0.974-0.994) | 0.0081  | 0.983 (0.97-0.995)  | 0.0313  | 0.986 (0.97-1.003)  | 0.4534  | 0.987 (0.975-0.999) | 0.1538  | 0.987 (0.973-1.002) | 0.3507  | 0.987 (0.967-1.008) | 0.988   |
| <b>Wind (m/s)</b>               | 1.025 (1.015-1.036) | <0.0001 | 1.026 (1.014-1.039) | 0.0003  | 1.024 (1.006-1.041) | 0.0488  | 1.03 (1.016-1.043)  | 0.0001  | 1.033 (1.017-1.049) | 0.0004  | 1.022 (1.001-1.045) | 0.3142  |
| <b>Sunshine Duration (h)</b>    | 0.979 (0.968-0.989) | 0.0004  | 0.979 (0.966-0.992) | 0.007   | 0.978 (0.961-0.995) | 0.083   | 1.023 (1.001-1.046) | 0.1538  | 1.031 (1.004-1.059) | 0.1149  | 1.007 (0.971-1.044) | 0.988   |
| <b>Delta Air Temp. (°C)</b>     | 0.983 (0.973-0.993) | 0.0052  | 0.983 (0.971-0.996) | 0.0313  | 0.981 (0.965-0.998) | 0.1604  | 0.996 (0.98-1.014)  | 0.6847  | 0.999 (0.979-1.02)  | 0.932   | 0.991 (0.963-1.02)  | 0.988   |
| <b>Snow (mm)*</b>               | 1.001 (0.987-1.016) | 0.8687  | 1.002 (0.985-1.02)  | 0.9976  | 0.998 (0.974-1.023) | 0.8964  | 0.992 (0.974-1.011) | 0.6847  | 0.993 (0.972-1.016) | 0.932   | 0.99 (0.958-1.022)  | 0.988   |
| <b>Average Air Temp. (°C)</b>   | 0.963 (0.954-0.973) | <0.0001 | 0.968 (0.956-0.98)  | <0.0001 | 0.954 (0.938-0.97)  | <0.0001 |                     |         |                     |         |                     |         |
| <b>Max. Air Temp. (°C)</b>      | 0.963 (0.953-0.973) | <0.0001 | 0.967 (0.955-0.98)  | <0.0001 | 0.954 (0.938-0.97)  | <0.0001 |                     |         |                     |         |                     |         |
| <b>Effective Air Temp. (°C)</b> | 1.011 (0.998-1.024) | 0.6092  | 1.012 (0.997-1.028) | 0.7379  | 1.007 (0.986-1.029) | 0.8087  |                     |         |                     |         |                     |         |

## Uppsala/orebro

|                                 |                     |         |                     |         |                     |         |                     |         |                     |         |                     |         |
|---------------------------------|---------------------|---------|---------------------|---------|---------------------|---------|---------------------|---------|---------------------|---------|---------------------|---------|
| <b>Min. Air Temp. (°C)</b>      | 0.967 (0.96-0.975)  | <0.0001 | 0.973 (0.963-0.982) | <0.0001 | 0.957 (0.945-0.969) | <0.0001 | 0.966 (0.958-0.975) | <0.0001 | 0.975 (0.965-0.986) | <0.0001 | 0.949 (0.936-0.963) | <0.0001 |
| <b>Precipitation (mm)</b>       | 0.989 (0.982-0.997) | 0.0498  | 0.99 (0.98-0.999)   | 0.2193  | 0.989 (0.976-1.002) | 0.3989  | 0.991 (0.982-1)     | 0.1827  | 0.991 (0.979-1.002) | 0.3299  | 0.991 (0.975-1.006) | 0.6904  |
| <b>Air Humidity (%)</b>         | 1 (0.992-1.008)     | 0.9811  | 0.996 (0.986-1.006) | 0.7708  | 1.008 (0.996-1.022) | 0.3989  | 0.992 (0.976-1.009) | 0.6124  | 0.977 (0.958-0.997) | 0.1528  | 1.024 (0.996-1.052) | 0.4601  |
| <b>Air Pressure (kPa)</b>       | 0.994 (0.986-1.002) | 0.3697  | 0.996 (0.986-1.006) | 0.7708  | 0.99 (0.977-1.003)  | 0.3989  | 0.989 (0.979-0.998) | 0.0722  | 0.989 (0.977-1)     | 0.2861  | 0.988 (0.973-1.003) | 0.4837  |
| <b>Wind (m/s)</b>               | 1.008 (1.001-1.016) | 0.1313  | 1.008 (0.998-1.018) | 0.4573  | 1.01 (0.997-1.023)  | 0.3989  | 1.009 (1-1.02)      | 0.1864  | 1.003 (0.991-1.016) | 0.6564  | 1.022 (1.006-1.039) | 0.0616  |
| <b>Sunshine Duration (h)</b>    | 0.987 (0.979-0.995) | 0.0075  | 0.987 (0.977-0.997) | 0.0602  | 0.987 (0.974-1)     | 0.3426  | 0.978 (0.962-0.995) | 0.0579  | 0.964 (0.944-0.985) | 0.0051  | 1.006 (0.978-1.035) | 0.8002  |
| <b>Delta Air Temp. (°C)</b>     | 1 (0.992-1.008)     | 0.9811  | 1.001 (0.992-1.011) | 0.7708  | 0.996 (0.984-1.009) | 0.5749  | 1.018 (1.004-1.032) | 0.0579  | 1.016 (0.999-1.033) | 0.288   | 1.023 (1-1.046)     | 0.3045  |
| <b>Snow (mm)*</b>               | 1.012 (1.001-1.023) | 0.128   | 1.011 (0.997-1.025) | 0.4573  | 1.015 (0.998-1.032) | 0.3989  | 1.004 (0.989-1.019) | 0.6124  | 1.004 (0.986-1.023) | 0.6564  | 1.003 (0.979-1.028) | 0.8002  |
| <b>Average Air Temp. (°C)</b>   | 0.97 (0.963-0.978)  | <0.0001 | 0.975 (0.966-0.985) | <0.0001 | 0.959 (0.947-0.972) | <0.0001 |                     |         |                     |         |                     |         |
| <b>Max. Air Temp. (°C)</b>      | 0.972 (0.964-0.979) | <0.0001 | 0.977 (0.967-0.986) | <0.0001 | 0.961 (0.949-0.974) | <0.0001 |                     |         |                     |         |                     |         |
| <b>Effective Air Temp. (°C)</b> | 0.987 (0.978-0.996) | 0.033   | 0.995 (0.984-1.007) | 0.7657  | 0.971 (0.957-0.986) | 0.0007  |                     |         |                     |         |                     |         |

## North

|                            |                     |        |                     |        |                    |        |                     |         |                     |         |                     |        |
|----------------------------|---------------------|--------|---------------------|--------|--------------------|--------|---------------------|---------|---------------------|---------|---------------------|--------|
| <b>Min. Air Temp. (°C)</b> | 0.995 (0.982-1.009) | 0.8565 | 1.003 (0.986-1.021) | 0.7011 | 0.98 (0.958-1.001) | 0.3379 | 0.988 (0.971-1.005) | 0.4922  | 0.997 (0.976-1.018) | 0.8773  | 0.971 (0.944-0.998) | 0.2404 |
| <b>Precipitation (mm)</b>  | 1.011 (0.997-1.025) | 0.7908 | 1.011 (0.994-1.028) | 0.7011 | 1.01 (0.988-1.032) | 0.8039 | 0.999 (0.984-1.015) | 0.9391  | 0.998 (0.98-1.018)  | 0.8773  | 1.001 (0.975-1.026) | 0.966  |
| <b>Air Humidity (%)</b>    | 1.016 (1.002-1.031) | 0.1762 | 1.021 (1.004-1.039) | 0.1287 | 1.007 (0.985-1.03) | 0.8039 | 1.062 (1.038-1.086) | <0.0001 | 1.083 (1.054-1.114) | <0.0001 | 1.02 (0.983-1.058)  | 0.8888 |



|                                 |                     |         |                     |         |                     |        |                     |         |                     |         |                     |        |
|---------------------------------|---------------------|---------|---------------------|---------|---------------------|--------|---------------------|---------|---------------------|---------|---------------------|--------|
| <b>Air Pressure (kPa)</b>       | 0.985 (0.972-0.999) | 0.271   | 0.991 (0.974-1.008) | 0.7011  | 0.975 (0.954-0.997) | 0.2003 | 0.999 (0.984-1.015) | 0.9391  | 1.008 (0.989-1.027) | 0.8773  | 0.982 (0.958-1.007) | 0.7932 |
| <b>Wind (m/s)</b>               | 1.048 (1.034-1.063) | <0.0001 | 1.054 (1.037-1.072) | <0.0001 | 1.036 (1.014-1.059) | 0.0122 | 1.063 (1.046-1.081) | <0.0001 | 1.077 (1.055-1.098) | <0.0001 | 1.037 (1.01-1.065)  | 0.05   |
| <b>Sunshine Duration (h)</b>    | 0.994 (0.98-1.008)  | 0.8565  | 0.996 (0.979-1.013) | 0.7011  | 0.99 (0.967-1.012)  | 0.8039 | 1.041 (1.014-1.069) | 0.0184  | 1.049 (1.015-1.083) | 0.0245  | 1.025 (0.982-1.07)  | 0.8888 |
| <b>Delta Air Temp. (°C)</b>     | 1.001 (0.987-1.015) | 0.8565  | 1.003 (0.986-1.021) | 0.7011  | 0.997 (0.975-1.019) | 0.8039 | 1.018 (0.997-1.039) | 0.3411  | 1.028 (1.002-1.054) | 0.17    | 0.999 (0.966-1.033) | 0.966  |
| <b>Snow (mm)*</b>               | 1.042 (1.023-1.062) | 0.0002  | 1.041 (1.017-1.065) | 0.0064  | 1.045 (1.016-1.076) | 0.023  | 1.037 (1.008-1.067) | 0.0643  | 1.032 (0.997-1.068) | 0.2855  | 1.045 (1-1.093)     | 0.307  |
| <b>Average Air Temp. (°C)</b>   | 0.996 (0.983-1.01)  | 0.8565  | 1.005 (0.988-1.022) | 0.7011  | 0.98 (0.958-1.001)  | 0.3379 |                     |         |                     |         |                     |        |
| <b>Max. Air Temp. (°C)</b>      | 0.996 (0.982-1.01)  | 0.8565  | 1.005 (0.988-1.022) | 0.7011  | 0.979 (0.958-1.001) | 0.3379 |                     |         |                     |         |                     |        |
| <b>Effective Air Temp. (°C)</b> | 0.997 (0.981-1.013) | 0.8958  | 1.003 (0.984-1.023) | 0.7657  | 0.984 (0.96-1.009)  | 0.8087 |                     |         |                     |         |                     |        |

## Season

### Jan-mars

|                                 |                    |       |                    |        |                    |        |                    |        |                    |        |                    |        |
|---------------------------------|--------------------|-------|--------------------|--------|--------------------|--------|--------------------|--------|--------------------|--------|--------------------|--------|
| <b>Min. Air Temp. (°C)</b>      | 1.001(0.987-1.016) | 0.883 | 1.001(0.983-1.02)  | 0.9089 | 1.001(0.983-1.021) | 0.9588 | 1.025(1.009-1.041) | 0.0431 | 1.038(1.019-1.058) | 0.0031 | 0.999(0.972-1.026) | 0.9466 |
| <b>Precipitation (mm)</b>       | 1.007(0.993-1.02)  | 0.883 | 1.008(0.991-1.025) | 0.9089 | 1.004(0.987-1.022) | 0.9588 | 0.996(0.978-1.015) | 0.8608 | 1(0.978-1.023)     | 0.9975 | 0.989(0.958-1.021) | 0.9466 |
| <b>Air Humidity (%)</b>         | 1.004(0.992-1.015) | 0.883 | 1.004(0.989-1.019) | 0.9089 | 1.003(0.988-1.018) | 0.9588 | 0.998(0.98-1.017)  | 0.8608 | 0.992(0.971-1.015) | 0.9975 | 1.01(0.979-1.043)  | 0.9466 |
| <b>Air Pressure (kPa)</b>       | 0.997(0.989-1.005) | 0.883 | 0.999(0.988-1.009) | 0.9089 | 0.993(0.983-1.004) | 0.9588 | 0.996(0.989-1.004) | 0.8608 | 0.998(0.989-1.008) | 0.9975 | 0.993(0.98-1.006)  | 0.9466 |
| <b>Wind (m/s)</b>               | 0.999(0.99-1.008)  | 0.883 | 0.998(0.987-1.01)  | 0.9089 | 1(0.988-1.011)     | 0.9588 | 0.996(0.987-1.005) | 0.8608 | 0.993(0.982-1.004) | 0.9975 | 1.002(0.986-1.018) | 0.9466 |
| <b>Sunshine Duration (h)</b>    | 0.99(0.976-1.004)  | 0.883 | 0.986(0.968-1.004) | 0.9089 | 0.998(0.978-1.017) | 0.9588 | 0.973(0.95-0.996)  | 0.3168 | 0.954(0.926-0.982) | 0.0335 | 1.011(0.97-1.053)  | 0.9466 |
| <b>Delta Air Temp. (°C)</b>     | 1.006(0.995-1.018) | 0.883 | 1.011(0.997-1.026) | 0.9089 | 0.997(0.983-1.012) | 0.9588 | 1.026(1.012-1.04)  | 0.0051 | 1.04(1.023-1.057)  | 0.0001 | 0.998(0.975-1.022) | 0.9466 |
| <b>Snow (mm)*</b>               | 1.005(0.998-1.012) | 0.883 | 1.005(0.996-1.015) | 0.9089 | 1.004(0.994-1.014) | 0.9588 | 1.006(0.996-1.015) | 0.8608 | 1.006(0.994-1.018) | 0.9975 | 1.005(0.989-1.022) | 0.9466 |
| <b>Average Air Temp. (°C)</b>   | 1.008(0.991-1.026) | 0.883 | 1.012(0.989-1.035) | 0.9089 | 1.002(0.979-1.025) | 0.9588 |                    |        |                    |        |                    |        |
| <b>Max. Air Temp. (°C)</b>      | 1.01(0.99-1.029)   | 0.883 | 1.015(0.99-1.041)  | 0.9089 | 0.999(0.973-1.025) | 0.9588 |                    |        |                    |        |                    |        |
| <b>Effective Air Temp. (°C)</b> | 1.006(0.993-1.018) | 0.883 | 1.008(0.991-1.025) | 0.9089 | 1(0.984-1.017)     | 0.9588 |                    |        |                    |        |                    |        |

### Apr-June

|                            |                    |         |                    |        |                    |        |                    |        |                    |        |                    |        |
|----------------------------|--------------------|---------|--------------------|--------|--------------------|--------|--------------------|--------|--------------------|--------|--------------------|--------|
| <b>Min. Air Temp. (°C)</b> | 0.958(0.944-0.973) | <0.0001 | 0.96(0.941-0.98)   | 0.0037 | 0.954(0.934-0.976) | 0.0012 | 0.968(0.953-0.982) | 0.0004 | 0.976(0.958-0.994) | 0.1633 | 0.951(0.927-0.976) | 0.0043 |
| <b>Precipitation (mm)</b>  | 0.973(0.963-0.982) | <0.0001 | 0.974(0.962-0.987) | 0.0029 | 0.97(0.956-0.984)  | 0.0012 | 0.976(0.966-0.986) | 0.0002 | 0.981(0.969-0.994) | 0.0816 | 0.965(0.948-0.983) | 0.0049 |
| <b>Air Humidity (%)</b>    | 0.981(0.973-0.99)  | 0.0009  | 0.978(0.966-0.989) | 0.0047 | 0.988(0.976-1.001) | 0.9588 | 0.99(0.974-1.007)  | 0.8608 | 0.978(0.958-0.998) | 0.4164 | 1.015(0.987-1.045) | 0.9466 |
| <b>Air Pressure (kPa)</b>  | 1.008(0.996-1.021) | 0.883   | 1.014(0.997-1.031) | 0.9089 | 0.998(0.98-1.016)  | 0.9588 | 0.971(0.957-0.985) | 0.0013 | 0.975(0.958-0.992) | 0.0976 | 0.962(0.939-0.986) | 0.058  |
| <b>Wind (m/s)</b>          | 0.99(0.978-1.001)  | 0.883   | 0.984(0.969-0.998) | 0.9057 | 1.002(0.985-1.018) | 0.9588 | 0.993(0.98-1.005)  | 0.8608 | 0.983(0.968-0.999) | 0.4164 | 1.012(0.99-1.034)  | 0.9466 |

|                                 |                    |        |                    |        |                    |        |                    |        |                    |        |                    |        |
|---------------------------------|--------------------|--------|--------------------|--------|--------------------|--------|--------------------|--------|--------------------|--------|--------------------|--------|
| <b>Sunshine Duration (h)</b>    | 1.009(1-1.019)     | 0.883  | 1.01(0.998-1.022)  | 0.9089 | 1.009(0.995-1.023) | 0.9588 | 0.984(0.966-1.003) | 0.8608 | 0.971(0.949-0.993) | 0.2092 | 1.012(0.98-1.045)  | 0.9466 |
| <b>Delta Air Temp. (°C)</b>     | 1.024(1.014-1.035) | 0.0001 | 1.03(1.016-1.043)  | 0.0007 | 1.013(0.999-1.028) | 0.9588 | 1.025(1.007-1.043) | 0.1337 | 1.028(1.005-1.051) | 0.2594 | 1.019(0.988-1.052) | 0.9466 |
| <b>Average Air Temp. (°C)</b>   | 0.973(0.958-0.989) | 0.0225 | 0.978(0.958-0.998) | 0.9089 | 0.964(0.943-0.986) | 0.0482 |                    |        |                    |        |                    |        |
| <b>Max. Air Temp. (°C)</b>      | 0.985(0.97-1.001)  | 0.883  | 0.992(0.972-1.012) | 0.9089 | 0.972(0.951-0.994) | 0.4093 |                    |        |                    |        |                    |        |
| <b>Effective Air Temp. (°C)</b> | 0.988(0.967-1.01)  | 0.883  | 0.988(0.96-1.017)  | 0.9089 | 0.988(0.958-1.02)  | 0.9588 |                    |        |                    |        |                    |        |

## July-Sept

|                                 |                    |        |                    |        |                    |         |                    |         |                    |        |                    |         |
|---------------------------------|--------------------|--------|--------------------|--------|--------------------|---------|--------------------|---------|--------------------|--------|--------------------|---------|
| <b>Min. Air Temp. (°C)</b>      | 0.958(0.936-0.98)  | 0.0078 | 0.975(0.947-1.005) | 0.9089 | 0.924(0.895-0.953) | <0.0001 | 0.948(0.929-0.968) | <0.0001 | 0.97(0.946-0.995)  | 0.2842 | 0.905(0.873-0.938) | <0.0001 |
| <b>Precipitation (mm)</b>       | 0.995(0.986-1.003) | 0.883  | 0.995(0.984-1.005) | 0.9089 | 0.995(0.983-1.006) | 0.9588  | 0.987(0.978-0.995) | 0.0663  | 0.984(0.973-0.994) | 0.0664 | 0.993(0.977-1.008) | 0.9466  |
| <b>Air Humidity (%)</b>         | 1.01(0.996-1.023)  | 0.883  | 1.011(0.993-1.028) | 0.9089 | 1.008(0.99-1.027)  | 0.9588  | 1.03(1.006-1.054)  | 0.2249  | 1.045(1.015-1.075) | 0.0657 | 1.001(0.961-1.043) | 0.9466  |
| <b>Air Pressure (kPa)</b>       | 0.999(0.986-1.012) | 0.883  | 1.005(0.988-1.022) | 0.9089 | 0.988(0.97-1.006)  | 0.9588  | 1.006(0.991-1.021) | 0.8608  | 1.013(0.994-1.031) | 0.9975 | 0.992(0.967-1.018) | 0.9466  |
| <b>Wind (m/s)</b>               | 1.019(1.007-1.032) | 0.0539 | 1.023(1.007-1.038) | 0.1518 | 1.013(0.996-1.03)  | 0.9588  | 1.02(1.007-1.034)  | 0.069   | 1.032(1.015-1.049) | 0.0045 | 0.997(0.974-1.021) | 0.9466  |
| <b>Sunshine Duration (h)</b>    | 0.982(0.972-0.992) | 0.0161 | 0.978(0.965-0.991) | 0.0267 | 0.99(0.976-1.005)  | 0.9588  | 1.012(0.99-1.034)  | 0.8608  | 1.003(0.977-1.03)  | 0.9975 | 1.03(0.991-1.07)   | 0.9466  |
| <b>Delta Air Temp. (°C)</b>     | 0.989(0.977-1)     | 0.883  | 0.991(0.976-1.006) | 0.9089 | 0.984(0.968-1)     | 0.9588  | 0.98(0.959-1.001)  | 0.8248  | 0.996(0.97-1.023)  | 0.9975 | 0.947(0.912-0.983) | 0.1057  |
| <b>Average Air Temp. (°C)</b>   | 0.948(0.927-0.971) | 0.0003 | 0.966(0.938-0.996) | 0.8015 | 0.913(0.885-0.943) | <0.0001 |                    |         |                    |        |                    |         |
| <b>Max. Air Temp. (°C)</b>      | 0.952(0.931-0.973) | 0.0004 | 0.969(0.942-0.997) | 0.8934 | 0.918(0.891-0.947) | <0.0001 |                    |         |                    |        |                    |         |
| <b>Effective Air Temp. (°C)</b> | 0.928(0.866-0.995) | 0.883  | 0.923(0.843-1.01)  | 0.9089 | 0.94(0.855-1.034)  | 0.9588  |                    |         |                    |        |                    |         |

## Oct-Dec

|                               |                    |        |                    |        |                    |        |                    |         |                    |        |                    |        |
|-------------------------------|--------------------|--------|--------------------|--------|--------------------|--------|--------------------|---------|--------------------|--------|--------------------|--------|
| <b>Min. Air Temp. (°C)</b>    | 0.993(0.98-1.007)  | 0.883  | 1.005(0.988-1.022) | 0.9089 | 0.972(0.954-0.99)  | 0.0809 | 0.994(0.981-1.008) | 0.8608  | 0.996(0.979-1.012) | 0.9975 | 0.992(0.969-1.016) | 0.9466 |
| <b>Precipitation (mm)</b>     | 1.01(1.001-1.019)  | 0.883  | 1.011(0.999-1.023) | 0.9089 | 1.009(0.996-1.022) | 0.9588 | 0.99(0.98-1)       | 0.6133  | 0.993(0.981-1.005) | 0.9975 | 0.983(0.966-1)     | 0.9466 |
| <b>Air Humidity (%)</b>       | 0.996(0.98-1.013)  | 0.883  | 0.999(0.978-1.02)  | 0.9089 | 0.991(0.968-1.014) | 0.9588 | 1.034(1.01-1.058)  | 0.0949  | 1.056(1.026-1.087) | 0.0048 | 0.992(0.952-1.032) | 0.9466 |
| <b>Air Pressure (kPa)</b>     | 0.982(0.974-0.99)  | 0.0004 | 0.983(0.973-0.994) | 0.0691 | 0.978(0.967-0.989) | 0.0059 | 0.985(0.977-0.993) | 0.0052  | 0.989(0.979-0.999) | 0.4164 | 0.977(0.963-0.99)  | 0.0231 |
| <b>Wind (m/s)</b>             | 1.018(1.01-1.027)  | 0.0012 | 1.021(1.01-1.032)  | 0.0081 | 1.013(1.001-1.026) | 0.917  | 1.02(1.01-1.03)    | 0.0013  | 1.028(1.016-1.04)  | 0.0002 | 1.005(0.989-1.022) | 0.9466 |
| <b>Sunshine Duration (h)</b>  | 1.002(0.983-1.021) | 0.883  | 1.008(0.984-1.032) | 0.9089 | 0.99(0.962-1.017)  | 0.9588 | 1.01(0.983-1.037)  | 0.8608  | 1.034(1-1.068)     | 0.6046 | 0.963(0.919-1.009) | 0.9466 |
| <b>Delta Air Temp. (°C)</b>   | 1.03(1.015-1.045)  | 0.0018 | 1.031(1.012-1.05)  | 0.0388 | 1.028(1.008-1.049) | 0.2315 | 1.039(1.024-1.055) | <0.0001 | 1.038(1.019-1.057) | 0.002  | 1.042(1.016-1.07)  | 0.0411 |
| <b>Snow (mm)*</b>             | 1.012(1.004-1.02)  | 0.0567 | 1.006(0.997-1.016) | 0.9089 | 1.022(1.012-1.033) | 0.0007 | 1.01(1.002-1.017)  | 0.2428  | 1.005(0.995-1.014) | 0.9975 | 1.019(1.006-1.033) | 0.1031 |
| <b>Average Air Temp. (°C)</b> | 1.002(0.987-1.017) | 0.883  | 1.015(0.996-1.034) | 0.9089 | 0.977(0.957-0.998) | 0.8508 |                    |         |                    |        |                    |        |
| <b>Max. Air Temp. (°C)</b>    | 1.006(0.99-1.023)  | 0.883  | 1.021(1-1.043)     | 0.9089 | 0.977(0.955-1)     | 0.9588 |                    |         |                    |        |                    |        |

|                                 |                    |       |                   |        |                   |        |
|---------------------------------|--------------------|-------|-------------------|--------|-------------------|--------|
| <b>Effective Air Temp. (°C)</b> | 0.997(0.985-1.008) | 0.883 | 1.005(0.991-1.02) | 0.9089 | 0.98(0.964-0.995) | 0.3404 |
|---------------------------------|--------------------|-------|-------------------|--------|-------------------|--------|

## Lag

### Lag 1 days

|                                 |                    |         |                    |         |                    |         |                    |         |                    |         |                    |         |
|---------------------------------|--------------------|---------|--------------------|---------|--------------------|---------|--------------------|---------|--------------------|---------|--------------------|---------|
| <b>Min. Air Temp. (°C)</b>      | 0.968(0.963-0.973) | <0.0001 | 0.971(0.965-0.978) | <0.0001 | 0.962(0.955-0.968) | <0.0001 | 0.972(0.966-0.977) | <0.0001 | 0.977(0.969-0.984) | <0.0001 | 0.962(0.955-0.97)  | <0.0001 |
| <b>Precipitation (mm)</b>       | 0.996(0.992-1.001) | 0.8918  | 0.995(0.989-1.001) | 0.9729  | 0.999(0.993-1.006) | 0.8248  | 0.998(0.993-1.004) | 0.9542  | 0.998(0.99-1.005)  | 0.8848  | 1(0.991-1.008)     | 0.9202  |
| <b>Air Humidity (%)</b>         | 1.003(0.998-1.008) | 0.8918  | 1(0.994-1.007)     | 0.9729  | 1.008(1.001-1.015) | 0.1975  | 0.996(0.985-1.007) | 0.9542  | 1.002(0.988-1.016) | 0.8848  | 0.985(0.97-1)      | 0.9202  |
| <b>Air Pressure (kPa)</b>       | 0.998(0.994-1.003) | 0.8918  | 1.003(0.997-1.01)  | 0.9729  | 0.988(0.982-0.995) | 0.0124  | 0.996(0.99-1.001)  | 0.9542  | 0.999(0.992-1.007) | 0.8848  | 0.988(0.979-0.996) | 0.1133  |
| <b>Wind (m/s)</b>               | 1.009(1.004-1.013) | 0.0123  | 1.006(1-1.012)     | 0.9729  | 1.014(1.007-1.02)  | 0.0015  | 1.009(1.003-1.015) | 0.1072  | 1.01(1.002-1.018)  | 0.2231  | 1.006(0.997-1.015) | 0.9202  |
| <b>Sunshine Duration (h)</b>    | 0.983(0.979-0.988) | <0.0001 | 0.986(0.98-0.992)  | 0.0002  | 0.978(0.971-0.984) | <0.0001 | 0.977(0.964-0.99)  | 0.0099  | 0.973(0.957-0.99)  | 0.0316  | 0.984(0.966-1.003) | 0.9202  |
| <b>Delta Air Temp. (°C)</b>     | 0.999(0.994-1.004) | 0.8918  | 1.006(0.999-1.012) | 0.9729  | 0.987(0.98-0.994)  | 0.0031  | 1.02(1.011-1.029)  | 0.0006  | 1.031(1.019-1.043) | <0.0001 | 0.999(0.986-1.012) | 0.9202  |
| <b>Snow (mm)*</b>               | 1.007(1.002-1.013) | 0.1099  | 1.005(0.998-1.012) | 0.9729  | 1.012(1.004-1.019) | 0.021   | 1.004(0.997-1.011) | 0.9542  | 1.002(0.993-1.011) | 0.8848  | 1.006(0.996-1.016) | 0.9202  |
| <b>Average Air Temp. (°C)</b>   | 0.971(0.966-0.975) | <0.0001 | 0.975(0.969-0.981) | <0.0001 | 0.962(0.955-0.968) | <0.0001 |                    |         |                    |         |                    |         |
| <b>Max. Air Temp. (°C)</b>      | 0.972(0.968-0.977) | <0.0001 | 0.978(0.972-0.984) | <0.0001 | 0.962(0.956-0.969) | <0.0001 |                    |         |                    |         |                    |         |
| <b>Effective Air Temp. (°C)</b> | 0.989(0.983-0.994) | 0.0007  | 0.991(0.985-0.998) | 0.3186  | 0.983(0.976-0.99)  | 0.0001  |                    |         |                    |         |                    |         |

### Lag 3 days

|                                 |                    |         |                    |         |                    |         |                    |         |                    |         |                    |         |
|---------------------------------|--------------------|---------|--------------------|---------|--------------------|---------|--------------------|---------|--------------------|---------|--------------------|---------|
| <b>Min. Air Temp. (°C)</b>      | 0.966(0.961-0.971) | <0.0001 | 0.968(0.962-0.974) | <0.0001 | 0.962(0.955-0.968) | <0.0001 | 0.971(0.966-0.977) | <0.0001 | 0.976(0.969-0.983) | <0.0001 | 0.962(0.955-0.97)  | <0.0001 |
| <b>Precipitation (mm)</b>       | 0.991(0.986-0.996) | 0.0061  | 0.986(0.98-0.992)  | 0.0003  | 1.001(0.994-1.008) | 0.8248  | 0.994(0.988-1)     | 0.6228  | 0.989(0.981-0.996) | 0.0609  | 1.004(0.996-1.013) | 0.9202  |
| <b>Air Humidity (%)</b>         | 1(0.995-1.005)     | 0.8918  | 0.996(0.99-1.002)  | 0.9729  | 1.009(1.002-1.016) | 0.1396  | 0.985(0.974-0.996) | 0.1332  | 0.989(0.975-1.003) | 0.8848  | 0.978(0.962-0.993) | 0.1165  |
| <b>Air Pressure (kPa)</b>       | 0.999(0.994-1.004) | 0.8918  | 1.005(0.998-1.011) | 0.9729  | 0.989(0.982-0.995) | 0.0148  | 0.993(0.987-0.999) | 0.4113  | 0.997(0.989-1.004) | 0.8848  | 0.987(0.978-0.995) | 0.0512  |
| <b>Wind (m/s)</b>               | 1.008(1.003-1.013) | 0.0207  | 1.006(1-1.012)     | 0.9729  | 1.012(1.006-1.019) | 0.0065  | 1.004(0.998-1.01)  | 0.9542  | 1.007(0.999-1.015) | 0.8848  | 0.998(0.989-1.007) | 0.9202  |
| <b>Sunshine Duration (h)</b>    | 0.983(0.979-0.988) | <0.0001 | 0.987(0.981-0.993) | 0.0014  | 0.975(0.969-0.982) | <0.0001 | 0.974(0.962-0.987) | 0.0016  | 0.969(0.953-0.985) | 0.0048  | 0.984(0.966-1.002) | 0.9202  |
| <b>Delta Air Temp. (°C)</b>     | 0.997(0.992-1.002) | 0.8918  | 1.004(0.998-1.01)  | 0.9729  | 0.983(0.976-0.99)  | <0.0001 | 1.01(1-1.019)      | 0.6228  | 1.02(1.008-1.032)  | 0.0183  | 0.989(0.976-1.002) | 0.9202  |
| <b>Snow (mm)*</b>               | 1.002(0.997-1.007) | 0.8918  | 1(0.993-1.006)     | 0.9729  | 1.007(1-1.014)     | 0.3341  | 0.999(0.992-1.006) | 0.9542  | 0.999(0.99-1.008)  | 0.8848  | 0.999(0.989-1.009) | 0.9202  |
| <b>Average Air Temp. (°C)</b>   | 0.967(0.962-0.972) | <0.0001 | 0.971(0.965-0.977) | <0.0001 | 0.96(0.954-0.966)  | <0.0001 |                    |         |                    |         |                    |         |
| <b>Max. Air Temp. (°C)</b>      | 0.969(0.965-0.974) | <0.0001 | 0.974(0.968-0.98)  | <0.0001 | 0.961(0.954-0.967) | <0.0001 |                    |         |                    |         |                    |         |
| <b>Effective Air Temp. (°C)</b> | 0.984(0.979-0.989) | <0.0001 | 0.986(0.979-0.993) | 0.0024  | 0.98(0.973-0.987)  | <0.0001 |                    |         |                    |         |                    |         |

## Lag 5 days

|                                 |                    |         |                    |         |                    |         |                    |         |                    |         |                    |         |
|---------------------------------|--------------------|---------|--------------------|---------|--------------------|---------|--------------------|---------|--------------------|---------|--------------------|---------|
| <b>Min. Air Temp. (°C)</b>      | 0.967(0.962-0.972) | <0.0001 | 0.968(0.962-0.974) | <0.0001 | 0.965(0.959-0.971) | <0.0001 | 0.972(0.966-0.977) | <0.0001 | 0.975(0.967-0.982) | <0.0001 | 0.966(0.958-0.974) | <0.0001 |
| <b>Precipitation (mm)</b>       | 0.992(0.987-0.997) | 0.0318  | 0.989(0.983-0.995) | 0.0127  | 0.999(0.992-1.006) | 0.8248  | 0.995(0.99-1.001)  | 0.9542  | 0.992(0.984-0.999) | 0.5319  | 1.002(0.994-1.011) | 0.9202  |
| <b>Air Humidity (%)</b>         | 1.001(0.996-1.006) | 0.8918  | 0.996(0.99-1.002)  | 0.9729  | 1.01(1.004-1.017)  | 0.0328  | 0.985(0.975-0.996) | 0.1406  | 0.985(0.971-0.999) | 0.5319  | 0.987(0.971-1.002) | 0.9202  |
| <b>Air Pressure (kPa)</b>       | 0.999(0.994-1.004) | 0.8918  | 1.002(0.996-1.009) | 0.9729  | 0.993(0.986-0.999) | 0.2087  | 0.995(0.989-1.001) | 0.9542  | 0.997(0.989-1.005) | 0.8848  | 0.991(0.983-1)     | 0.8323  |
| <b>Wind (m/s)</b>               | 1.009(1.004-1.014) | 0.0052  | 1.01(1.003-1.016)  | 0.0634  | 1.008(1.002-1.015) | 0.145   | 1.005(0.999-1.011) | 0.9542  | 1.008(1.001-1.016) | 0.5319  | 0.998(0.989-1.007) | 0.9202  |
| <b>Sunshine Duration (h)</b>    | 0.983(0.979-0.988) | <0.0001 | 0.987(0.981-0.993) | 0.0005  | 0.977(0.97-0.984)  | <0.0001 | 0.982(0.969-0.995) | 0.1159  | 0.975(0.959-0.991) | 0.0517  | 0.996(0.978-1.015) | 0.9202  |
| <b>Delta Air Temp. (°C)</b>     | 0.994(0.989-0.999) | 0.1514  | 1(0.994-1.006)     | 0.9729  | 0.981(0.975-0.988) | <0.0001 | 1(0.991-1.009)     | 0.9542  | 1.01(0.998-1.022)  | 0.8848  | 0.981(0.968-0.994) | 0.1165  |
| <b>Snow (mm)*</b>               | 1.004(0.999-1.01)  | 0.8918  | 1.003(0.996-1.01)  | 0.9729  | 1.008(1-1.015)     | 0.2355  | 1.006(0.998-1.013) | 0.9542  | 1.003(0.994-1.012) | 0.8848  | 1.011(1.001-1.021) | 0.8268  |
| <b>Average Air Temp. (°C)</b>   | 0.967(0.963-0.972) | <0.0001 | 0.97(0.964-0.976)  | <0.0001 | 0.963(0.956-0.969) | <0.0001 |                    |         |                    |         |                    |         |
| <b>Max. Air Temp. (°C)</b>      | 0.969(0.964-0.974) | <0.0001 | 0.972(0.966-0.979) | <0.0001 | 0.963(0.956-0.969) | <0.0001 |                    |         |                    |         |                    |         |
| <b>Effective Air Temp. (°C)</b> | 0.986(0.981-0.991) | <0.0001 | 0.987(0.98-0.994)  | 0.0079  | 0.983(0.976-0.99)  | 0.0001  |                    |         |                    |         |                    |         |

## Lag 7 days

|                                 |                    |         |                    |         |                    |         |                    |         |                    |         |                    |         |
|---------------------------------|--------------------|---------|--------------------|---------|--------------------|---------|--------------------|---------|--------------------|---------|--------------------|---------|
| <b>Min. Air Temp. (°C)</b>      | 0.969(0.964-0.973) | <0.0001 | 0.97(0.964-0.976)  | <0.0001 | 0.966(0.96-0.972)  | <0.0001 | 0.979(0.973-0.984) | <0.0001 | 0.982(0.975-0.989) | <0.0001 | 0.972(0.964-0.98)  | <0.0001 |
| <b>Precipitation (mm)</b>       | 0.989(0.984-0.993) | 0.0001  | 0.987(0.981-0.993) | 0.0011  | 0.992(0.985-0.999) | 0.1526  | 0.987(0.981-0.993) | 0.0004  | 0.985(0.978-0.992) | 0.0022  | 0.991(0.983-1)     | 0.8674  |
| <b>Air Humidity (%)</b>         | 1.004(0.999-1.009) | 0.8918  | 1.002(0.996-1.008) | 0.9729  | 1.009(1.002-1.015) | 0.1414  | 0.985(0.974-0.996) | 0.1332  | 0.985(0.971-0.999) | 0.5319  | 0.985(0.97-1.001)  | 0.9202  |
| <b>Air Pressure (kPa)</b>       | 0.999(0.994-1.004) | 0.8918  | 1.001(0.995-1.007) | 0.9729  | 0.996(0.989-1.003) | 0.8248  | 0.995(0.989-1.001) | 0.9542  | 0.995(0.988-1.003) | 0.8848  | 0.994(0.986-1.003) | 0.9202  |
| <b>Wind (m/s)</b>               | 1.01(1.005-1.015)  | 0.002   | 1.009(1.003-1.015) | 0.0944  | 1.011(1.004-1.018) | 0.0168  | 1.005(0.999-1.011) | 0.9542  | 1.006(0.998-1.013) | 0.8848  | 1.004(0.996-1.013) | 0.9202  |
| <b>Sunshine Duration (h)</b>    | 0.979(0.975-0.984) | <0.0001 | 0.98(0.974-0.986)  | <0.0001 | 0.977(0.97-0.984)  | <0.0001 | 0.967(0.954-0.979) | <0.0001 | 0.962(0.946-0.978) | 0.0001  | 0.976(0.958-0.995) | 0.3019  |
| <b>Delta Air Temp. (°C)</b>     | 0.992(0.987-0.996) | 0.0145  | 0.995(0.989-1.001) | 0.9729  | 0.985(0.978-0.991) | 0.0002  | 1.008(0.998-1.017) | 0.9542  | 1.013(1.001-1.025) | 0.5319  | 0.998(0.984-1.011) | 0.9202  |
| <b>Snow (mm)*</b>               | 1.008(1.003-1.014) | 0.0315  | 1.006(0.999-1.013) | 0.9729  | 1.013(1.006-1.02)  | 0.0051  | 1.008(1.001-1.015) | 0.4113  | 1.006(0.997-1.015) | 0.8848  | 1.012(1.002-1.022) | 0.5295  |
| <b>Average Air Temp. (°C)</b>   | 0.968(0.964-0.973) | <0.0001 | 0.971(0.965-0.977) | <0.0001 | 0.964(0.958-0.971) | <0.0001 |                    |         |                    |         |                    |         |
| <b>Max. Air Temp. (°C)</b>      | 0.97(0.965-0.974)  | <0.0001 | 0.972(0.966-0.978) | <0.0001 | 0.965(0.958-0.971) | <0.0001 |                    |         |                    |         |                    |         |
| <b>Effective Air Temp. (°C)</b> | 0.989(0.984-0.994) | 0.0014  | 0.99(0.983-0.997)  | 0.0811  | 0.988(0.98-0.995)  | 0.0155  |                    |         |                    |         |                    |         |

## Sensitivity Analyses

|                            |  |  |  |  |  |  |                     |         |                     |         |                     |         |
|----------------------------|--|--|--|--|--|--|---------------------|---------|---------------------|---------|---------------------|---------|
| <b>Min. Air Temp. (°C)</b> |  |  |  |  |  |  | 0.97 (0.966-0.975)  | <0.0001 | 0.976 (0.969-0.982) | <0.0001 | 0.961 (0.953-0.968) | <0.0001 |
| <b>Precipitation (mm)</b>  |  |  |  |  |  |  | 0.992 (0.987-0.998) | 0.0039  | 0.995 (0.989-1.001) | 0.1324  | 0.987 (0.979-0.995) | 0.0023  |

|                                                            |                     |         |                     |         |                     |         |
|------------------------------------------------------------|---------------------|---------|---------------------|---------|---------------------|---------|
| <b>Air Humidity (%)</b>                                    | 1.004 (0.994-1.014) | 0.4214  | 1.002 (0.99-1.015)  | 0.6917  | 1.007 (0.991-1.023) | 0.3805  |
| <b>Air Pressure (kPa)</b>                                  | 0.988 (0.983-0.993) | <0.0001 | 0.991 (0.984-0.997) | 0.0045  | 0.984 (0.975-0.992) | 0.0001  |
| <b>Wind (m/s)</b>                                          | 1.011 (1.005-1.016) | 0.0001  | 1.01 (1.003-1.016)  | 0.0057  | 1.013 (1.004-1.021) | 0.0053  |
| <b>Sunshine Duration (h)</b>                               | 0.999 (0.988-1.011) | 0.9134  | 0.997 (0.983-1.011) | 0.6545  | 1.005 (0.986-1.024) | 0.6217  |
| <b>Delta Air Temp. (°C)</b>                                | 1.009 (1.001-1.017) | 0.0271  | 1.01 (1-1.02)       | 0.0552  | 1.007 (0.994-1.021) | 0.263   |
| *Adjusted for day of week and year                         |                     |         |                     |         |                     |         |
| <b>Min. Air Temp. (°C)</b>                                 | 1.007 (0.996-1.019) | 0.9652  | 1.024 (1.009-1.040) | 0.0196  | 0.975 (0.958-0.991) | 0.0374  |
| <b>Precipitation (mm)</b>                                  | 0.993 (0.987-0.999) | 0.2045  | 0.995 (0.987-1.003) | 0.8811  | 0.989 (0.980-0.998) | 0.1254  |
| <b>Air Humidity (%)</b>                                    | 1.000 (0.988-1.012) | 0.9652  | 0.999 (0.984-1.014) | 0.8811  | 1.002 (0.984-1.019) | 0.8641  |
| <b>Air Pressure (kPa)</b>                                  | 0.988 (0.982-0.994) | 0.0009  | 0.992 (0.985-1.000) | 0.3080  | 0.981 (0.972-0.989) | <0.0001 |
| <b>Wind (m/s)</b>                                          | 1.005 (0.999-1.012) | 0.8696  | 1.004 (0.996-1.013) | 0.8811  | 1.006 (0.997-1.016) | 0.8641  |
| <b>Sunshine Duration (h)</b>                               | 0.989 (0.977-1.002) | 0.8696  | 0.982 (0.965-0.998) | 0.2640  | 1.005 (0.987-1.025) | 0.8641  |
| <b>Delta Air Temp. (°C)</b>                                | 1.021 (1.011-1.031) | 0.0004  | 1.030 (1.017-1.043) | <0.0001 | 1.004 (0.989-1.018) | 0.8641  |
| * Adjusted for calendar week as categorical variable       |                     |         |                     |         |                     |         |
| <b>Min. Air Temp. (°C)</b>                                 | 0.963 (0.952-0.974) | <0.0001 | 0.972 (0.958-0.985) | 0.0007  | 0.944 (0.927-0.962) | <0.0001 |
| <b>Precipitation (mm)</b>                                  | 1.000 (0.990-1.011) | 0.9652  | 1.007 (0.994-1.019) | 0.8811  | 0.987 (0.970-1.004) | 0.8641  |
| <b>Air Humidity (%)</b>                                    | 1.024 (1.004-1.044) | 0.1993  | 1.041 (1.017-1.066) | 0.0102  | 0.990 (0.959-1.022) | 0.8641  |
| <b>Air Pressure (kPa)</b>                                  | 0.993 (0.982-1.004) | 0.9652  | 1.002 (0.989-1.016) | 0.8811  | 0.975 (0.958-0.993) | 0.0650  |
| <b>Wind (m/s)</b>                                          | 1.020 (1.007-1.033) | 0.2322  | 1.027 (1.011-1.043) | 0.0100  | 1.006 (0.985-1.027) | 0.8641  |
| <b>Sunshine Duration (h)</b>                               | 1.002 (0.981-1.024) | 0.9652  | 1.004 (0.979-1.031) | 0.8811  | 0.997 (0.963-1.032) | 0.8641  |
| <b>Delta Air Temp. (°C)</b>                                | 1.004 (0.988-1.021) | 0.9652  | 1.005 (0.985-1.025) | 0.8811  | 1.003 (0.976-1.030) | 0.8641  |
| * Adjusted for air pollution(CO, NOx, NO2, PM10 and ozone) |                     |         |                     |         |                     |         |

**eTable 3. Results of primary and secondary analyses including seasonal and sensitivity analyses.**

All P-values are adjusted for multiple testing using false discovery rate with the Benjamini-Hochberg method. The main analyses, regional seasonal, lagged, sensitivity and subgroups analyses were adjusted separately within strata (total MI, NSTEMI and STEMI).

CI= confidence interval; IRR=incidence rate ratio; NSTEMI= non ST-elevation myocardial infarction; STEMI= ST-elevation myocardial infarction.

Supplementary  
Table 4.  
Subgroup  
Analyses.

| Subgroup              | Meteorological variable | Unadjusted          | Adjusted P-value    | Adjusted            | Adjusted P-value    |
|-----------------------|-------------------------|---------------------|---------------------|---------------------|---------------------|
|                       |                         | Total MI            |                     | Total MI            |                     |
|                       |                         | IRR (95%CI)         |                     | IRR (95%CI)         |                     |
| Men                   | Min. Air Temp. (°C)     | 0,97 (0,965-0,976)  | <0,0001             | 0,972 (0,965-0,978) | <0,0001             |
|                       | Precipitation (mm)      | 0,991 (0,985-0,997) | 0,2431              | 0,99 (0,983-0,996)  | 0,4567              |
|                       | Air Humidity (%)        | 0,998 (0,993-1,004) | 0,9999              | 0,996 (0,984-1,009) | 0,9934              |
|                       | Air Pressure (kPa)      | 0,994 (0,988-0,999) | 0,9999              | 0,988 (0,981-0,995) | 0,1154              |
|                       | Wind (m/s)              | 1,012 (1,006-1,018) | 0,0056              | 1,011 (1,004-1,018) | 0,4916              |
|                       | Sunshine Duration (h)   | 0,989 (0,983-0,994) | 0,0151              | 0,988 (0,973-1,003) | 0,9934              |
|                       | Delta Air Temp. (°C)    | 1 (0,995-1,006)     | 0,9999              | 1,013 (1,002-1,024) | 0,9934              |
|                       | Women                   | Min. Air Temp. (°C) | 0,975 (0,968-0,982) | <0,0001             | 0,979 (0,971-0,987) |
| Precipitation (mm)    |                         | 0,994 (0,987-1,001) | 0,9999              | 0,989 (0,98-0,997)  | 0,9934              |
| Air Humidity (%)      |                         | 1,003 (0,996-1,01)  | 0,9999              | 1,003 (0,987-1,02)  | 0,9934              |
| Air Pressure (kPa)    |                         | 0,991 (0,984-0,998) | 0,9999              | 0,986 (0,977-0,994) | 0,1664              |
| Wind (m/s)            |                         | 1,013 (1,006-1,02)  | 0,0557              | 1,013 (1,004-1,022) | 0,8501              |
| Sunshine Duration (h) |                         | 0,985 (0,978-0,992) | 0,0036              | 0,982 (0,964-1,001) | 0,9934              |
| Delta Air Temp. (°C)  |                         | 0,998 (0,991-1,005) | 0,9999              | 1,021 (1,007-1,034) | 0,4389              |
| Age≥75 years          |                         | Min. Air Temp. (°C) | 0,971 (0,965-0,978) | <0,0001             | 0,972 (0,965-0,98)  |
|                       | Precipitation (mm)      | 0,993 (0,987-1)     | 0,9999              | 0,992 (0,984-1)     | 0,9934              |
|                       | Air Humidity (%)        | 0,999 (0,992-1,005) | 0,9999              | 1 (0,985-1,014)     | 0,9934              |
|                       | Air Pressure (kPa)      | 0,992 (0,985-0,998) | 0,9999              | 0,987 (0,979-0,995) | 0,1761              |
|                       | Wind (m/s)              | 1,016 (1,009-1,022) | 0,0005              | 1,015 (1,007-1,024) | 0,0600              |
|                       | Sunshine Duration (h)   | 0,988 (0,981-0,994) | 0,0373              | 0,991 (0,973-1,008) | 0,9934              |
|                       | Delta Air Temp. (°C)    | 0,999 (0,993-1,006) | 0,9999              | 1,015 (1,002-1,027) | 0,9934              |
|                       | Age<75 years            | Min. Air Temp. (°C) | 0,972 (0,967-0,978) | <0,0001             | 0,976 (0,969-0,983) |
| Precipitation (mm)    |                         | 0,991 (0,985-0,997) | 0,5466              | 0,987 (0,98-0,995)  | 0,1228              |
| Air Humidity (%)      |                         | 1,001 (0,995-1,007) | 0,9999              | 0,998 (0,985-1,012) | 0,9934              |
| Air Pressure (kPa)    |                         | 0,994 (0,988-1)     | 0,9999              | 0,988 (0,98-0,995)  | 0,1761              |
| Wind (m/s)            |                         | 1,009 (1,003-1,015) | 0,4050              | 1,008 (1-1,016)     | 0,9934              |
| Sunshine Duration (h) |                         | 0,987 (0,981-0,993) | 0,0043              | 0,982 (0,966-0,998) | 0,9934              |
| Delta Air Temp. (°C)  |                         | 0,999 (0,993-1,005) | 0,9999              | 1,017 (1,005-1,029) | 0,6407              |
| Current Smoker        |                         | Min. Air Temp. (°C) | 0,982 (0,973-0,99)  | 0,0086              | 0,984 (0,974-0,995) |
|                       | Precipitation (mm)      | 0,994 (0,985-1,003) | 0,9999              | 0,995 (0,984-1,007) | 0,9934              |
|                       | Air Humidity (%)        | 0,995 (0,986-1,004) | 0,9999              | 0,986 (0,966-1,006) | 0,9934              |
|                       | Air Pressure (kPa)      | 0,997 (0,989-1,006) | 0,9999              | 0,992 (0,981-1,004) | 0,9934              |
|                       | Wind (m/s)              | 1,008 (0,999-1,017) | 0,9999              | 1,006 (0,995-1,018) | 0,9934              |
|                       | Sunshine Duration (h)   | 0,993 (0,984-1,002) | 0,9999              | 0,983 (0,959-1,007) | 0,9934              |
|                       | Delta Air Temp. (°C)    | 1,002 (0,993-1,011) | 0,9999              | 1,007 (0,99-1,025)  | 0,9934              |
|                       | Non Smoker              | Min. Air Temp. (°C) | 0,968 (0,963-0,973) | <0,0001             | 0,97 (0,964-0,976)  |
| Precipitation (mm)    |                         | 0,991 (0,985-0,996) | 0,0925              | 0,987 (0,981-0,994) | 0,0253              |
| Air Humidity (%)      |                         | 1,002 (0,997-1,008) | 0,9999              | 1,004 (0,992-1,017) | 0,9934              |
| Air Pressure (kPa)    |                         | 0,993 (0,988-0,998) | 0,9999              | 0,988 (0,981-0,994) | 0,0420              |
| Wind (m/s)            |                         | 1,014 (1,008-1,019) | 0,0002              | 1,014 (1,007-1,021) | 0,0194              |
| Sunshine Duration (h) |                         | 0,985 (0,98-0,991)  | <0,0001             | 0,99 (0,976-1,004)  | 0,9934              |
| Delta Air Temp. (°C)  |                         | 0,997 (0,992-1,002) | 0,9999              | 1,015 (1,005-1,026) | 0,4950              |
| Diabetes              |                         | Min. Air Temp. (°C) | 0,973 (0,964-0,981) | <0,0001             | 0,978 (0,967-0,988) |

|                            |                       |                     |         |                     |         |
|----------------------------|-----------------------|---------------------|---------|---------------------|---------|
| No Diabetes                | Precipitation (mm)    | 0,996 (0,987-1,005) | 0,9999  | 0,99 (0,98-1,002)   | 0,9934  |
|                            | Air Humidity (%)      | 1,002 (0,993-1,011) | 0,9999  | 0,998 (0,978-1,019) | 0,9934  |
|                            | Air Pressure (kPa)    | 0,992 (0,983-1,001) | 0,9999  | 0,988 (0,977-0,999) | 0,9934  |
|                            | Wind (m/s)            | 1,014 (1,005-1,023) | 0,3008  | 1,014 (1,003-1,026) | 0,9934  |
|                            | Sunshine Duration (h) | 0,983 (0,974-0,992) | 0,0347  | 0,974 (0,95-0,998)  | 0,9934  |
|                            | Delta Air Temp. (°C)  | 1 (0,991-1,009)     | 0,9999  | 1,025 (1,007-1,042) | 0,7637  |
|                            | Min. Air Temp. (°C)   | 0,971 (0,966-0,977) | <0,0001 | 0,974 (0,968-0,98)  | <0,0001 |
|                            | Precipitation (mm)    | 0,991 (0,986-0,996) | 0,1778  | 0,989 (0,982-0,995) | 0,0985  |
| Hypertension               | Air Humidity (%)      | 1 (0,995-1,005)     | 0,9999  | 1 (0,988-1,011)     | 0,9934  |
|                            | Air Pressure (kPa)    | 0,994 (0,988-0,999) | 0,9999  | 0,987 (0,981-0,994) | 0,0242  |
|                            | Wind (m/s)            | 1,012 (1,007-1,017) | 0,0018  | 1,011 (1,005-1,018) | 0,1667  |
|                            | Sunshine Duration (h) | 0,988 (0,983-0,993) | 0,0013  | 0,987 (0,973-1,001) | 0,9934  |
|                            | Delta Air Temp. (°C)  | 0,999 (0,994-1,005) | 0,9999  | 1,015 (1,005-1,026) | 0,3895  |
|                            | Min. Air Temp. (°C)   | 0,968 (0,96-0,976)  | <0,0001 | 0,98 (0,971-0,989)  | 0,0060  |
|                            | Precipitation (mm)    | 0,993 (0,984-1,001) | 0,9999  | 0,983 (0,973-0,992) | 0,0896  |
|                            | Air Humidity (%)      | 1,01 (1,002-1,019)  | 0,9999  | 1,009 (0,991-1,027) | 0,9934  |
| No Hypertension            | Air Pressure (kPa)    | 0,995 (0,987-1,003) | 0,9999  | 0,994 (0,984-1,004) | 0,9934  |
|                            | Wind (m/s)            | 1,015 (1,007-1,024) | 0,0541  | 1,021 (1,01-1,031)  | 0,0149  |
|                            | Sunshine Duration (h) | 0,974 (0,966-0,981) | <0,0001 | 0,957 (0,936-0,977) | 0,0084  |
|                            | Delta Air Temp. (°C)  | 0,997 (0,988-1,005) | 0,9999  | 1,041 (1,025-1,057) | <0,0001 |
|                            | Min. Air Temp. (°C)   | 0,975 (0,969-0,98)  | <0,0001 | 0,97 (0,963-0,977)  | <0,0001 |
|                            | Precipitation (mm)    | 0,992 (0,986-0,998) | 0,9999  | 0,994 (0,987-1,002) | 0,9934  |
|                            | Air Humidity (%)      | 0,993 (0,987-0,999) | 0,9999  | 0,992 (0,979-1,006) | 0,9934  |
|                            | Air Pressure (kPa)    | 0,992 (0,986-0,998) | 0,9068  | 0,983 (0,976-0,99)  | 0,0012  |
| Coronary Artery Disease    | Wind (m/s)            | 1,01 (1,004-1,016)  | 0,1916  | 1,005 (0,997-1,013) | 0,9934  |
|                            | Sunshine Duration (h) | 0,997 (0,991-1,003) | 0,9999  | 1,008 (0,991-1,024) | 0,9934  |
|                            | Delta Air Temp. (°C)  | 1,001 (0,995-1,007) | 0,9999  | 0,998 (0,987-1,01)  | 0,9934  |
|                            | Min. Air Temp. (°C)   | 0,971 (0,964-0,978) | <0,0001 | 0,975 (0,966-0,983) | <0,0001 |
|                            | Precipitation (mm)    | 0,993 (0,986-1)     | 0,9999  | 0,989 (0,98-0,997)  | 0,9934  |
|                            | Air Humidity (%)      | 1,004 (0,997-1,011) | 0,9999  | 1 (0,984-1,016)     | 0,9934  |
|                            | Air Pressure (kPa)    | 0,992 (0,985-0,999) | 0,9999  | 0,988 (0,979-0,997) | 0,9072  |
|                            | Wind (m/s)            | 1,015 (1,008-1,022) | 0,0078  | 1,013 (1,004-1,023) | 0,7489  |
| No Coronary Artery Disease | Sunshine Duration (h) | 0,982 (0,975-0,99)  | 0,0003  | 0,982 (0,963-1,001) | 0,9934  |
|                            | Delta Air Temp. (°C)  | 0,995 (0,988-1,002) | 0,9999  | 1,016 (1,002-1,03)  | 0,9934  |
|                            | Min. Air Temp. (°C)   | 0,973 (0,967-0,978) | <0,0001 | 0,975 (0,968-0,982) | <0,0001 |
|                            | Precipitation (mm)    | 0,992 (0,987-0,998) | 0,9999  | 0,989 (0,983-0,996) | 0,4926  |
|                            | Air Humidity (%)      | 0,999 (0,993-1,005) | 0,9999  | 0,999 (0,986-1,012) | 0,9934  |
|                            | Air Pressure (kPa)    | 0,993 (0,988-0,999) | 0,9999  | 0,988 (0,981-0,995) | 0,0949  |
|                            | Wind (m/s)            | 1,012 (1,006-1,017) | 0,0156  | 1,012 (1,004-1,019) | 0,2897  |
|                            | Sunshine Duration (h) | 0,989 (0,983-0,995) | 0,0295  | 0,986 (0,971-1,002) | 0,9934  |
| Beta-blockers              | Delta Air Temp. (°C)  | 1,001 (0,995-1,007) | 0,9999  | 1,017 (1,006-1,028) | 0,3109  |
|                            | Min. Air Temp. (°C)   | 0,969 (0,963-0,976) | <0,0001 | 0,974 (0,966-0,982) | <0,0001 |
|                            | Precipitation (mm)    | 0,995 (0,988-1,002) | 0,9999  | 0,989 (0,981-0,998) | 0,9934  |
|                            | Air Humidity (%)      | 1,006 (0,999-1,013) | 0,9999  | 1,007 (0,991-1,022) | 0,9934  |
|                            | Air Pressure (kPa)    | 0,993 (0,986-1)     | 0,9999  | 0,989 (0,981-0,998) | 0,9934  |
|                            | Wind (m/s)            | 1,014 (1,007-1,021) | 0,0154  | 1,014 (1,005-1,023) | 0,2510  |
|                            | Sunshine Duration (h) | 0,98 (0,973-0,987)  | <0,0001 | 0,979 (0,961-0,997) | 0,9934  |
|                            | Delta Air Temp. (°C)  | 0,997 (0,99-1,004)  | 0,9999  | 1,023 (1,01-1,037)  | 0,0967  |
| No Beta-blockers           | Min. Air Temp. (°C)   | 0,974 (0,968-0,979) | <0,0001 | 0,975 (0,968-0,982) | <0,0001 |
|                            | Precipitation (mm)    | 0,99 (0,985-0,996)  | 0,1743  | 0,989 (0,982-0,996) | 0,3673  |



|                 |                       |                     |         |                     |         |
|-----------------|-----------------------|---------------------|---------|---------------------|---------|
| Ca-inhibitor    | Air Humidity (%)      | 0,996 (0,991-1,002) | 0,9999  | 0,994 (0,981-1,007) | 0,9934  |
|                 | Air Pressure (kPa)    | 0,993 (0,987-0,998) | 0,9999  | 0,985 (0,978-0,992) | 0,0118  |
|                 | Wind (m/s)            | 1,012 (1,006-1,017) | 0,0126  | 1,01 (1,002-1,018)  | 0,9934  |
|                 | Sunshine Duration (h) | 0,992 (0,986-0,998) | 0,9999  | 0,99 (0,975-1,006)  | 0,9934  |
|                 | Delta Air Temp. (°C)  | 1 (0,995-1,006)     | 0,9999  | 1,01 (0,999-1,022)  | 0,9934  |
|                 | Min. Air Temp. (°C)   | 0,964 (0,955-0,973) | <0,0001 | 0,966 (0,955-0,978) | <0,0001 |
|                 | Precipitation (mm)    | 0,998 (0,988-1,008) | 0,9999  | 0,99 (0,978-1,002)  | 0,9934  |
|                 | Air Humidity (%)      | 1,008 (0,998-1,017) | 0,9999  | 1,009 (0,987-1,032) | 0,9934  |
|                 | Air Pressure (kPa)    | 0,985 (0,976-0,995) | 0,4681  | 0,983 (0,971-0,995) | 0,7141  |
|                 | Wind (m/s)            | 1,023 (1,013-1,033) | 0,0011  | 1,022 (1,009-1,035) | 0,1629  |
| No Ca-inhibitor | Sunshine Duration (h) | 0,977 (0,967-0,987) | 0,0010  | 0,986 (0,96-1,012)  | 0,9934  |
|                 | Delta Air Temp. (°C)  | 0,992 (0,983-1,002) | 0,9999  | 1,023 (1,004-1,042) | 0,9934  |
|                 | Min. Air Temp. (°C)   | 0,974 (0,969-0,979) | <0,0001 | 0,976 (0,97-0,983)  | <0,0001 |
|                 | Precipitation (mm)    | 0,991 (0,986-0,996) | 0,1188  | 0,989 (0,982-0,995) | 0,0806  |
|                 | Air Humidity (%)      | 0,999 (0,994-1,004) | 0,9999  | 0,997 (0,986-1,009) | 0,9934  |
|                 | Air Pressure (kPa)    | 0,994 (0,989-1)     | 0,9999  | 0,988 (0,982-0,994) | 0,0371  |
|                 | Wind (m/s)            | 1,011 (1,005-1,016) | 0,0152  | 1,01 (1,003-1,017)  | 0,5663  |
|                 | Sunshine Duration (h) | 0,989 (0,984-0,994) | 0,0066  | 0,985 (0,971-0,999) | 0,9934  |
|                 | Delta Air Temp. (°C)  | 1,001 (0,995-1,006) | 0,9999  | 1,015 (1,005-1,025) | 0,4357  |
|                 | Min. Air Temp. (°C)   | 0,972 (0,965-0,978) | <0,0001 | 0,972 (0,964-0,98)  | <0,0001 |
| Aspirin         | Precipitation (mm)    | 0,996 (0,989-1,002) | 0,9999  | 0,993 (0,985-1,001) | 0,9934  |
|                 | Air Humidity (%)      | 1 (0,993-1,006)     | 0,9999  | 0,996 (0,981-1,011) | 0,9934  |
|                 | Air Pressure (kPa)    | 0,989 (0,982-0,995) | 0,1322  | 0,984 (0,976-0,992) | 0,0172  |
|                 | Wind (m/s)            | 1,018 (1,011-1,024) | <0,0001 | 1,013 (1,004-1,022) | 0,4698  |
|                 | Sunshine Duration (h) | 0,986 (0,98-0,993)  | 0,0093  | 0,991 (0,973-1,009) | 0,9934  |
|                 | Delta Air Temp. (°C)  | 0,996 (0,99-1,003)  | 0,9999  | 1,009 (0,996-1,022) | 0,9934  |
|                 | Min. Air Temp. (°C)   | 0,972 (0,967-0,978) | <0,0001 | 0,976 (0,969-0,983) | <0,0001 |
|                 | Precipitation (mm)    | 0,99 (0,984-0,996)  | 0,1020  | 0,986 (0,979-0,994) | 0,0475  |
|                 | Air Humidity (%)      | 1,001 (0,995-1,007) | 0,9999  | 1,002 (0,989-1,016) | 0,9934  |
|                 | Air Pressure (kPa)    | 0,996 (0,99-1,002)  | 0,9999  | 0,99 (0,983-0,997)  | 0,8288  |
| No Aspirin      | Wind (m/s)            | 1,009 (1,003-1,015) | 0,5327  | 1,011 (1,004-1,019) | 0,6208  |
|                 | Sunshine Duration (h) | 0,988 (0,982-0,994) | 0,0080  | 0,982 (0,966-0,998) | 0,9934  |
|                 | Delta Air Temp. (°C)  | 1,001 (0,995-1,007) | 0,9999  | 1,022 (1,01-1,033)  | 0,0428  |
|                 | Min. Air Temp. (°C)   | 0,97 (0,96-0,98)    | <0,0001 | 0,986 (0,974-0,998) | 0,9934  |
|                 | Precipitation (mm)    | 0,994 (0,984-1,005) | 0,9999  | 0,981 (0,969-0,994) | 0,5051  |
|                 | Air Humidity (%)      | 1,01 (0,999-1,021)  | 0,9999  | 1,001 (0,978-1,024) | 0,9934  |
|                 | Air Pressure (kPa)    | 0,993 (0,983-1,004) | 0,9999  | 0,991 (0,979-1,004) | 0,9934  |
|                 | Wind (m/s)            | 1,018 (1,007-1,029) | 0,1887  | 1,021 (1,008-1,035) | 0,3109  |
|                 | Sunshine Duration (h) | 0,97 (0,96-0,98)    | <0,0001 | 0,933 (0,907-0,959) | 0,0001  |
|                 | Delta Air Temp. (°C)  | 0,999 (0,989-1,01)  | 0,9999  | 1,058 (1,037-1,079) | <0,0001 |
| ACE-I/ARB       | Min. Air Temp. (°C)   | 0,973 (0,968-0,978) | <0,0001 | 0,969 (0,963-0,976) | <0,0001 |
|                 | Precipitation (mm)    | 0,991 (0,986-0,997) | 0,2431  | 0,992 (0,986-0,999) | 0,9934  |
|                 | Air Humidity (%)      | 0,996 (0,991-1,001) | 0,9999  | 0,999 (0,986-1,011) | 0,9934  |
|                 | Air Pressure (kPa)    | 0,993 (0,987-0,998) | 0,9999  | 0,985 (0,978-0,992) | 0,0038  |
|                 | Wind (m/s)            | 1,01 (1,005-1,016)  | 0,0375  | 1,008 (1,001-1,015) | 0,9934  |
|                 | Sunshine Duration (h) | 0,995 (0,99-1,001)  | 0,9999  | 1,011 (0,996-1,026) | 0,9934  |
|                 | Delta Air Temp. (°C)  | 0,999 (0,993-1,004) | 0,9999  | 0,998 (0,987-1,008) | 0,9934  |
|                 | Min. Air Temp. (°C)   | 0,963 (0,951-0,974) | <0,0001 | 0,984 (0,971-0,998) | 0,9934  |
|                 | Precipitation (mm)    | 0,987 (0,974-0,999) | 0,9999  | 0,977 (0,963-0,99)  | 0,1563  |
|                 | Air Humidity (%)      | 1,006 (0,994-1,019) | 0,9999  | 0,991 (0,965-1,016) | 0,9934  |
| Statins         | Air Pressure (kPa)    | 1,004 (0,992-1,017) | 0,9999  | 1,003 (0,989-1,017) | 0,9934  |
|                 | Wind (m/s)            | 1,019 (1,007-1,032) | 0,3579  | 1,028 (1,013-1,043) | 0,0385  |
|                 | Sunshine Duration (h) | 0,966 (0,955-0,977) | <0,0001 | 0,913 (0,886-0,942) | <0,0001 |
|                 | Delta Air Temp. (°C)  | 1,002 (0,99-1,015)  | 0,9999  | 1,064 (1,041-1,088) | <0,0001 |

|                              |                              |                            |                     |                     |                    |
|------------------------------|------------------------------|----------------------------|---------------------|---------------------|--------------------|
| No Statins                   | <b>Min. Air Temp. (°C)</b>   | 0,976 (0,971-0,981)        | <0,0001             | 0,971 (0,965-0,977) | <0,0001            |
|                              | <b>Precipitation (mm)</b>    | 0,994 (0,989-1)            | 0,9999              | 0,994 (0,987-1)     | 0,9934             |
|                              | <b>Air Humidity (%)</b>      | 0,998 (0,993-1,003)        | 0,9999              | 1,003 (0,991-1,015) | 0,9934             |
|                              | <b>Air Pressure (kPa)</b>    | 0,989 (0,984-0,994)        | 0,0029              | 0,981 (0,975-0,988) | <0,0001            |
|                              | <b>Wind (m/s)</b>            | 1,01 (1,005-1,015)         | 0,0178              | 1,006 (0,999-1,013) | 0,9934             |
|                              | <b>Sunshine Duration (h)</b> | 0,995 (0,99-1)             | 0,9999              | 1,014 (0,999-1,028) | 0,9934             |
|                              | <b>Delta Air Temp. (°C)</b>  | 0,998 (0,993-1,003)        | 0,9999              | 1 (0,99-1,01)       | 0,9934             |
|                              | Diuretics                    | <b>Min. Air Temp. (°C)</b> | 0,972 (0,964-0,979) | <0,0001             | 0,97 (0,96-0,979)  |
| <b>Precipitation (mm)</b>    |                              | 0,999 (0,992-1,007)        | 0,9999              | 1,004 (0,994-1,013) | 0,9934             |
| <b>Air Humidity (%)</b>      |                              | 0,996 (0,988-1,004)        | 0,9999              | 0,99 (0,972-1,008)  | 0,9934             |
| <b>Air Pressure (kPa)</b>    |                              | 0,993 (0,985-1,001)        | 0,9999              | 0,986 (0,977-0,996) | 0,7062             |
| <b>Wind (m/s)</b>            |                              | 1,01 (1,002-1,018)         | 0,9999              | 1,006 (0,996-1,016) | 0,9934             |
| <b>Sunshine Duration (h)</b> |                              | 0,991 (0,983-0,999)        | 0,9999              | 0,985 (0,964-1,006) | 0,9934             |
| <b>Delta Air Temp. (°C)</b>  |                              | 1,005 (0,997-1,013)        | 0,9999              | 1,02 (1,004-1,035)  | 0,9934             |
| No Diuretics                 |                              | <b>Min. Air Temp. (°C)</b> | 0,972 (0,967-0,978) | <0,0001             | 0,977 (0,97-0,983) |
|                              | <b>Precipitation (mm)</b>    | 0,989 (0,983-0,995)        | 0,0273              | 0,982 (0,976-0,989) | 0,0001             |
|                              | <b>Air Humidity (%)</b>      | 1,002 (0,997-1,008)        | 0,9999              | 1,004 (0,991-1,017) | 0,9934             |
|                              | <b>Air Pressure (kPa)</b>    | 0,993 (0,987-0,998)        | 0,9999              | 0,988 (0,981-0,995) | 0,0827             |
|                              | <b>Wind (m/s)</b>            | 1,014 (1,008-1,02)         | 0,0003              | 1,015 (1,007-1,022) | 0,0184             |
|                              | <b>Sunshine Duration (h)</b> | 0,985 (0,979-0,991)        | <0,0001             | 0,986 (0,971-1,001) | 0,9934             |
|                              | <b>Delta Air Temp. (°C)</b>  | 0,996 (0,991-1,002)        | 0,9999              | 1,015 (1,004-1,026) | 0,9934             |

**eTable 4. Results of subgroup analyses.**

All P-values are adjusted for multiple testing using false discovery rate with the Benjamini-Hochberg method.

CI= confidence interval; IRR=incidence rate ratio; NSTEMI= non ST-elevation myocardial infarction; STEMI= ST-elevation myocardial infarction.

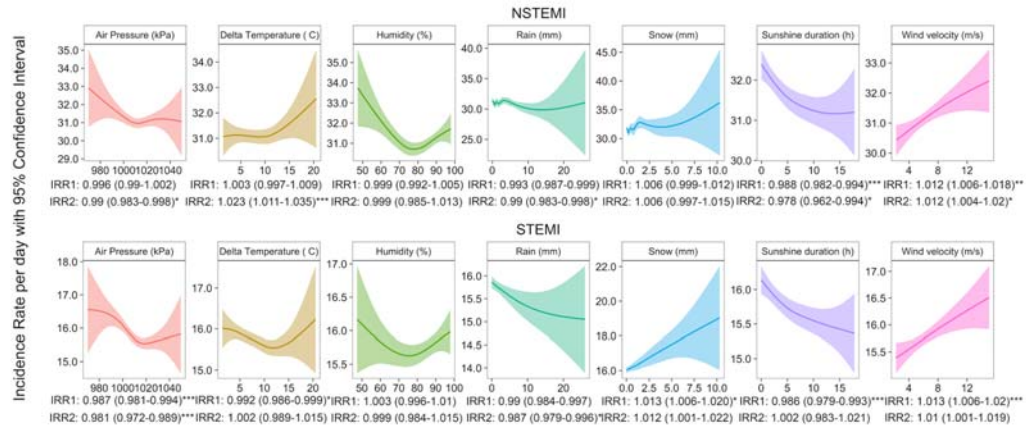

**eFigure 1.** Nationwide Daily Incidence Rate of Myocardial Infarction by Air Pressure,  $\delta$  Temperature, Humidity, Precipitation, Sunshine Duration, and Wind Velocity for STEMI and NSTEMI

### Minimum Air Temperature and Total MI by Region

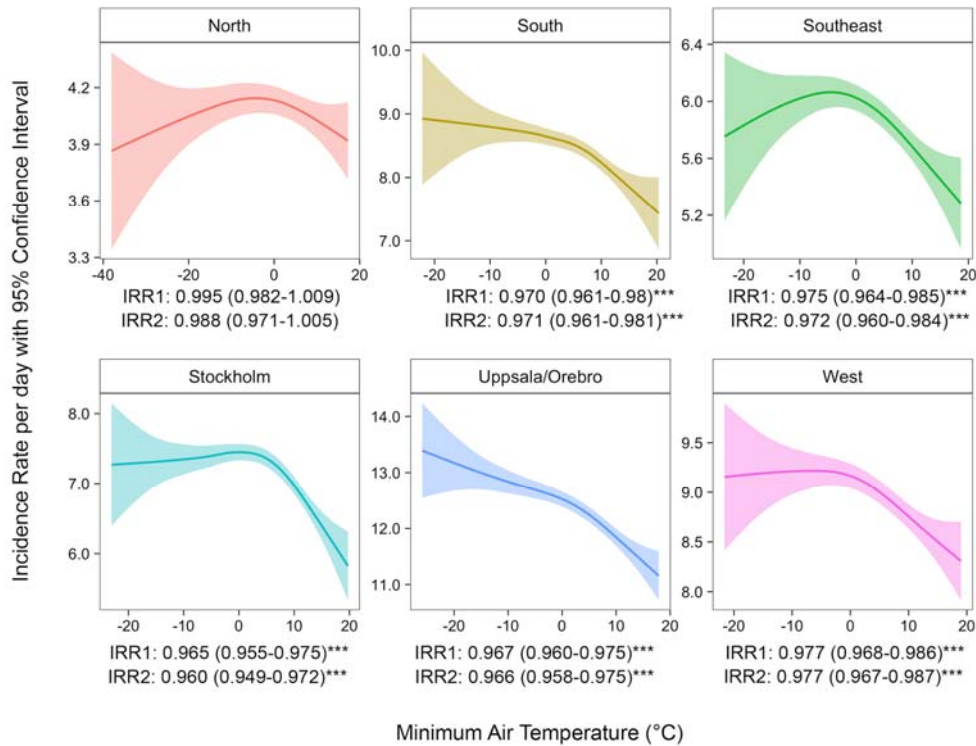

**eFigure 2.. Incidence of myocardial infarction by air temperature and region.**

Smoothed conditional mean plots visualizing the variation of incidence rates of myocardial infarction at different temperatures stratified by healthcare region.

Unadjusted and adjusted incidence rate ratio (IRR) and 95% CI from regression analyses is presented below each graph. Results from the regression analyses are interpreted as change per increase in standard deviation. One standard deviation of air temperature in South=6.7°C; Southeast=7.1°C; West=7.1°C; Stockholm=7.3°C; Uppsala/Orebro=7.9°C and North=9.6°C.

IRR1= Univariable model.

IRR2= Multivariable model.

\*p<0.05

\*\*p<0.01

\*\*\*p<0.001

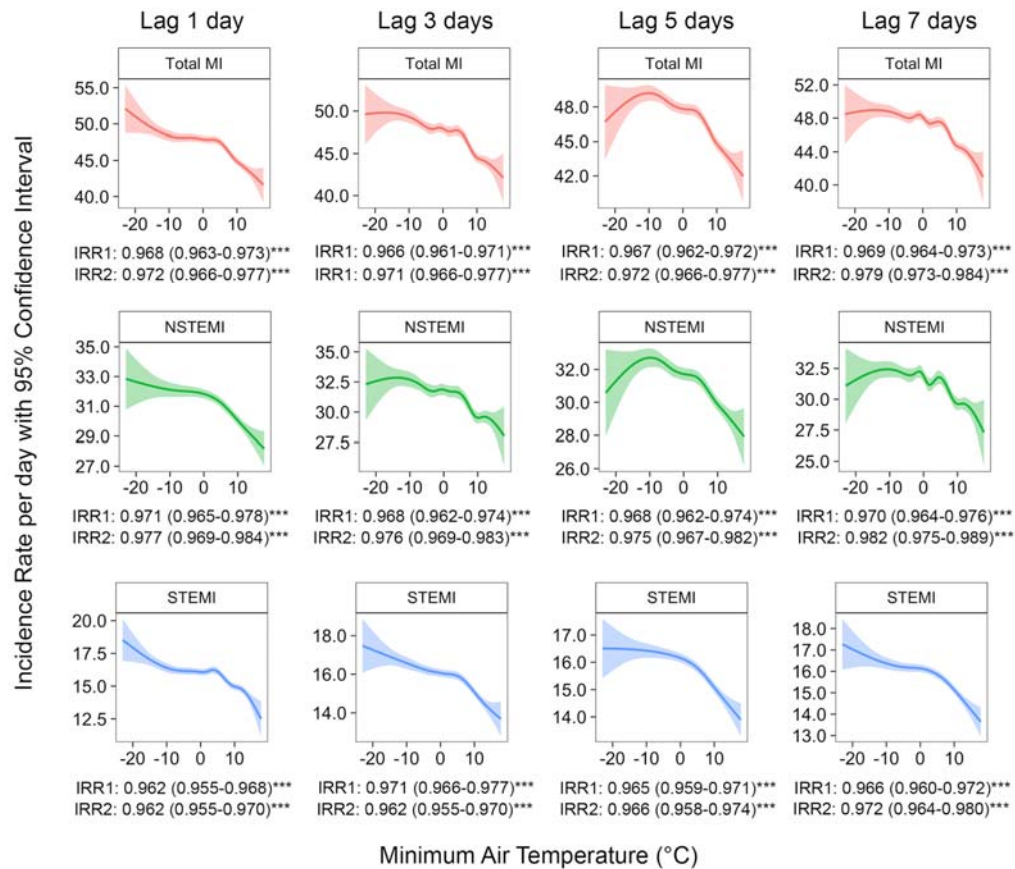

**Figure 3. Nationwide daily incidence rate of myocardial infarction by temperature with lag effect.**

Smoothed conditional mean plots visualizing the variation of incidence rates of myocardial infarction with a lag effect of 1, 3, 5 and 7 days. Unadjusted and adjusted incidence rate ratio (IRR) and 95% CI from regression analyses are presented below each graph. Results from the regression analyses are interpreted as change per increase in standard deviation (7.4°C). Lag analyses of remaining weather parameters are shown in supplementary figure 3 and supplementary table 3.

IRR1= Univariable model.

IRR2= Multivariable model.

\*p<0.05

\*\*p<0.01

\*\*\*p<0.001

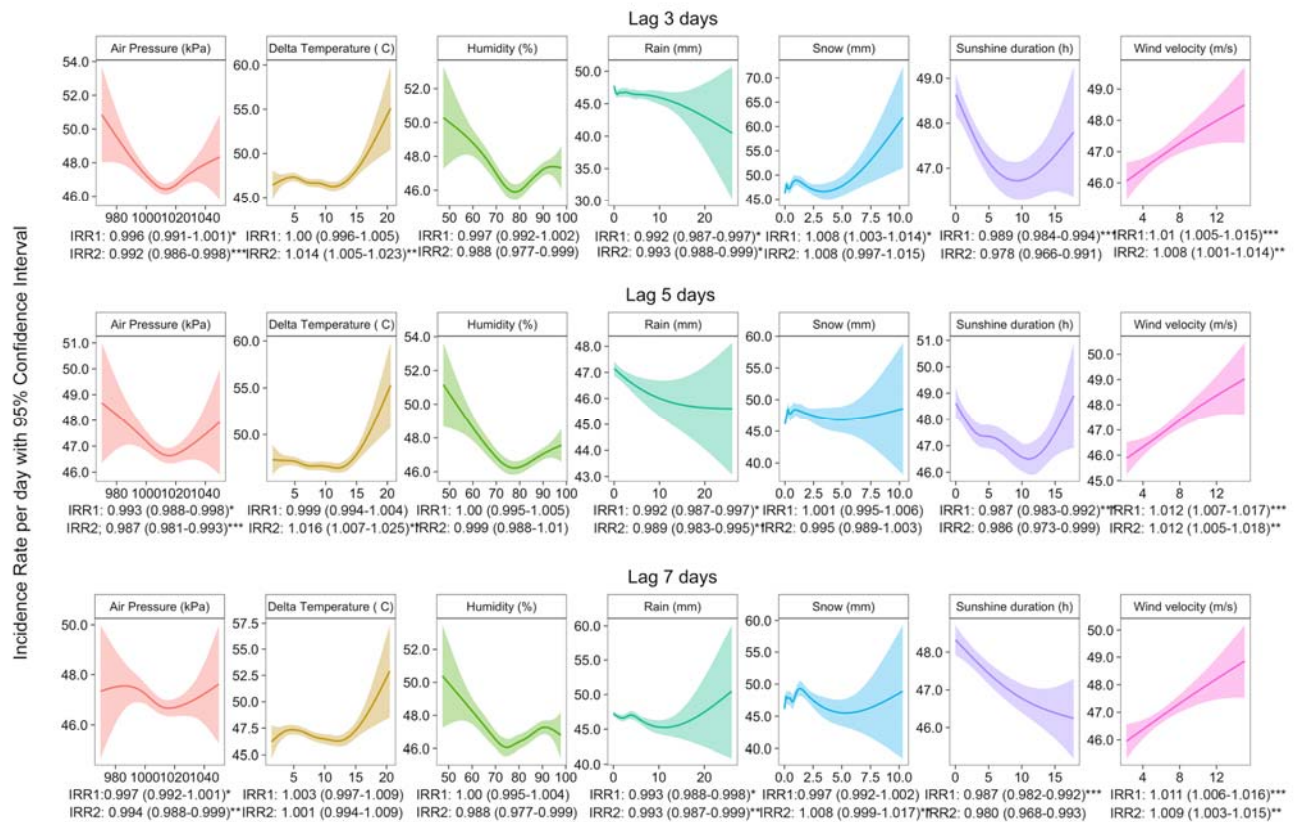

**Figure 4. Lag of 1, 3, 5 and 7 days.**

Smoothed conditional mean plots visualizing the incidence rate and 95% confidence interval for myocardial infarctions and weather parameters with lag effect of 1, 3, 5 and 7 days with incidence rate ratio (IRR) and 95%CI from regression analyses below each graph. Results from the regression analyses are interpreted as change for one increase in standard deviation. One standard deviation for air pressure=10.9kPa; Delta temperature=3.4°C; Humidity=9.6%; Rain=2.6mm; Snow=0.25mm; Sunshine duration=4.2h; Wind velocity=1.9m/s.

IRR1= Univariable model.

IRR2= Multivariable model.

\*=p<0.05

\*\*=p<0.01

\*\*\*=p<0.001
